# Supplementary material for: UV induced changes in proteome of rats plasma are reversed by dermally applied cannabidiol
Source: Sci Rep. 2021 Oct 19;11:20666. doi: 10.1038/s41598-021-00134-8 (PMC8526570; doi:10.1038/s41598-021-00134-8)
Supplement: Supplementary file 1 — Supplementary Information 1. [file 41598_2021_134_MOESM1_ESM.xlsx]

## Sheet: osocze szczury CBD - wszystkie 
Supplementary table S1. The proteins identified in the plasma from the control rats (CTR) and animals topically treated with cannabidiol (2.5g CBD in 100g petrolatum) and/or irradiated with UVA (increasing doses from 0.5 to 5 J/cm2) or UVB (increasing doses from 0.02 to 2 J/cm2).
Accession	Description	CTR 1	CTR 2	CTR 3	CTR 4	CTR 5	CTR 6	CBD 1	CBD 2	CBD 3	CBD 4	CBD 5	CBD 6	UVA 1	UVA 2	UVA 3	UVA 4	UVA 5	UVA 6	UVA+CBD 1	UVA+CBD 2	UVA+CBD 3	UVA+CBD 4	UVA+CBD 5	UVA+CBD 6	UVB 1	UVB 2	UVB 3	UVB 4	UVB 5	UVB 6	UVB+CBD 1	UVB+CBD 2	UVB+CBD 3	UVB+CBD 4	UVB+CBD 5	UVB+CBD 6
B8ZZL8	10 kDa heat shock protein	120000000	120000000	120000000	120000000	560000	560000	920000	20000000	560000	560000	560000	560000	2200000	5500000	2200000	2200000	58000000	2200000	3400000	5800000	5800000	5800000	810000	3200000	35000000	1500000	1500000	1500000	1500000	1500000	1500000	140000	140000	1200000	1200000	140000
Q15029	116 kDa U5 small nuclear ribonucleoprotein component	920000	920000	920000	920000	920000	920000	920000	60000000	920000	920000	920000	920000	1100000	2400000	1100000	1100000	1100000	1100000	1100000	21000000	21000000	21000000	20000000	20000000	20000000	3900000	3900000	1700000	7900000	2700000	2700000	310000	310000	1200000	1200000	310000
Q6LD62	14-3-3 protein A2	920000	920000	920000	920000	920000	920000	15000000	940000	920000	920000	920000	920000	19000000	58000000	19000000	19000000	19000000	19000000	19000000	21000000	21000000	21000000	810000	810000	810000	3900000	3900000	2800000	7900000	1700000	1700000	1500000	1500000	1200000	1200000	1500000
B5BU24	14-3-3 protein beta/alpha	920000	920000	920000	920000	920000	920000	920000	81000000	920000	920000	920000	920000	1400000	2400000	1400000	1400000	2200000	1400000	2200000	21000000	2100000	2400000	2700000	2700000	2700000	1500000	1500000	1500000	1500000	3900000	3900000	140000	29000000	2200000	2200000	140000
I3L3T1	14-3-3 protein epsilon	920000	920000	920000	920000	920000	920000	12000000	2200000	920000	920000	920000	920000	5500000	5500000	5500000	5500000	5500000	5500000	5500000	2900000	2900000	2900000	2900000	2900000	2900000	3900000	3900000	2700000	3900000	3900000	3900000	310000	310000	1200000	1200000	310000
A2IDB2	14-3-3 protein eta	920000	920000	920000	920000	920000	920000	12000000	2200000	920000	920000	920000	920000	5500000	5500000	5500000	5500000	5500000	5500000	5500000	4100000	4100000	4100000	20000000	20000000	20000000	2700000	2700000	7200000	7200000	7200000	7200000	310000	310000	2200000	2200000	310000
P61981	14-3-3 protein gamma	920000	920000	920000	920000	920000	920000	12000000	2200000	920000	920000	920000	920000	660000	5500000	660000	660000	660000	660000	660000	2400000	2400000	21000000	21000000	21000000	21000000	5400000	5400000	1700000	5400000	550000	550000	140000	2100000	1200000	1200000	140000
E9PG15	14-3-3 protein theta	920000	920000	920000	920000	920000	920000	15000000	12000000	920000	920000	920000	920000	2400000	470000	470000	470000	470000	2400000	470000	4100000	4100000	4100000	4100000	4100000	4100000	2800000	2800000	2400000	6600000	7200000	7200000	2100000	2100000	1200000	1200000	2100000
B7Z2E6	14-3-3 protein zeta/delta	920000	920000	920000	920000	920000	920000	20000000	430000	920000	920000	920000	920000	2400000	4300000	2400000	2400000	2400000	2400000	2400000	2100000	2100000	2400000	2400000	21000000	21000000	1700000	1700000	2400000	7200000	1500000	1500000	29000000	29000000	1200000	1200000	29000000
E5RJD2	2,4-dienoyl-CoA reductase	920000	920000	920000	920000	920000	920000	20000000	870000000	920000	920000	920000	920000	2200000	2200000	1100000	1100000	2400000	2200000	1100000	3200000	3200000	3200000	3200000	2100000	21000000	7200000	1500000	2400000	2400000	2400000	2400000	21000000	21000000	5600000	5600000	21000000
H0YJE9	26S protease regulatory subunit 10B	920000	920000	920000	920000	920000	920000	30000000	940000	920000	920000	920000	920000	5500000	5500000	5500000	5500000	5500000	5500000	5500000	21000000	2000000	2000000	2000000	2000000	2000000	2800000	2800000	9600000	2800000	1200000	1200000	1800000	1800000	440000	440000	1800000
P17980	26S protease regulatory subunit 6A	920000	920000	920000	920000	920000	920000	55000000	2100000	920000	920000	920000	920000	1200000	2200000	930000	930000	930000	1200000	930000	21000000	21000000	21000000	21000000	21000000	21000000	1200000	7200000	20000000	1200000	1200000	1200000	92000000	92000000	1200000	1200000	92000000
P43686	26S protease regulatory subunit 6B	920000	920000	920000	920000	920000	920000	60000000	5500000	920000	920000	920000	920000	3200000	58000000	3200000	3200000	3200000	3200000	3200000	2400000	2000000	21000000	21000000	20000000	20000000	1500000	1500000	3900000	1500000	3900000	3900000	140000	890000	5600000	5600000	140000
P51665	26S proteasome non-ATPase regulatory subunit 7	920000	920000	920000	920000	920000	920000	71000000	5500000	920000	920000	920000	920000	19000000	470000	470000	470000	470000	58000000	470000	2100000	2100000	2100000	2600000	2600000	2600000	1500000	1500000	3900000	3900000	3900000	3900000	140000	140000	5600000	5600000	140000
G5BYD2	3 beta-hydroxysteroid dehydrogenase type 7	120000000	120000000	120000000	120000000	560000	560000	920000	20000000	560000	560000	560000	560000	2200000	5500000	2200000	2200000	2200000	2200000	3400000	21000000	21000000	21000000	21000000	21000000	21000000	550000	7200000	2700000	2700000	2700000	2700000	29000000	29000000	1200000	960000	29000000
P25325	3-mercaptopyruvate sulfurtransferase	2200000	2200000	2200000	2200000	2200000	2200000	2100000	940000	2200000	2200000	2200000	370000	5500000	2400000	1200000	1300000	58000000	5500000	58000000	5800000	5800000	2600000	2400000	200000	2600000	4500000	4500000	4500000	4500000	4500000	2400000	980000	980000	1200000	1200000	980000
Q00013	55 kDa erythrocyte membrane protein	2200000	2200000	2200000	2200000	2200000	2200000	3000000	940000	2200000	2200000	2200000	370000	5500000	3200000	1200000	1300000	1300000	5500000	1300000	4100000	4100000	4100000	2400000	35000000	35000000	4500000	4500000	4500000	4500000	4500000	2400000	980000	980000	1200000	1200000	980000
B9VP19	60 kDa chaperonin	2200000	2200000	2200000	2200000	2200000	2200000	710000	940000	2200000	2200000	2200000	370000	660000	58000000	1200000	1300000	1300000	660000	1300000	810000	810000	20000000	2400000	2400000	2400000	4500000	4500000	4500000	4500000	4500000	2400000	980000	980000	1200000	1200000	980000
E7ESH4	60 kDa heat shock protein	2200000	2200000	2200000	2200000	2200000	2200000	710000	940000	2200000	2200000	2200000	370000	1200000	5500000	1200000	1300000	660000	1200000	660000	3200000	3200000	2500000	2400000	2400000	2400000	3000000	3000000	3000000	3000000	3000000	2400000	980000	980000	1200000	1200000	980000
G5BTI2	6-O-methylguanine-DNA methyltransferase	140000000	140000000	140000000	140000000	140000000	140000000	9900000	550000	24000000	24000000	24000000	24000000	58000000	1400000	58000000	58000000	19000000	58000000	19000000	20000000	2000000	2400000	2400000	21000000	21000000	2700000	7200000	5400000	5400000	5400000	5400000	5900000	5900000	400000	24000000	24000000
B4DL86	6-phosphogluconate dehydrogenase	1000000	1000000	1000000	1000000	1000000	1000000	14000000	920000	180000	180000	1000000	1000000	2400000	2800000	1100000	1100000	2200000	2200000	2200000	810000	810000	810000	810000	2100000	2100000	1100000	4600000	1100000	1100000	1100000	1500000	980000	980000	1200000	1200000	980000
G2IGE8	ABC transporter related protein	870000000	870000000	870000000	870000000	870000000	870000000	1000000	11000000	870000000	870000000	870000000	870000000	3200000	1400000	4000000	4000000	19000000	3200000	19000000	21000000	21000000	6300000	35000000	35000000	21000000	7600000	2700000	7900000	7900000	7900000	7900000	140000	5900000	5600000	5600000	140000
E7EMM4	Acid ceramidase	14000000	5200000	14000000	5200000	150000000	150000000	920000	12000000	150000000	150000000	5200000	5200000	340000	1400000	1700000	1700000	1700000	340000	49000000	20000000	1700000	1700000	21000000	590000	20000000	20000000	12000000	20000000	20000000	20000000	3900000	9700000	9700000	29000000	110000000	5600000
Q59EH3	Acid phosphatase 1	24000000	12000000	24000000	12000000	12000000	12000000	2200000	940000	12000000	24000000	1700000	1700000	5500000	4600000	5500000	5500000	1400000	5500000	1400000	6300000	6300000	1900000	1900000	2900000	2900000	7200000	14000000	1500000	2400000	1500000	1600000	1600000	1600000	1600000	1800000	1600000
H0YN26	Acidic leucine-rich nuclear phosphoprotein 32	42000000	12000000	42000000	12000000	12000000	12000000	430000	710000	12000000	42000000	1700000	1700000	660000	4600000	660000	660000	5500000	1400000	1400000	2100000	2100000	1900000	1900000	1900000	1900000	7200000	14000000	14000000	1200000	7600000	1600000	1600000	1600000	1600000	3200000	1600000
O75944	Aconitase	24000000	12000000	24000000	12000000	12000000	12000000	2200000	3000000	12000000	24000000	1700000	1700000	5500000	4600000	5500000	5500000	5500000	1100000	1100000	2700000	2700000	1900000	1900000	1900000	1900000	7200000	14000000	2800000	41000000	41000000	1600000	1600000	1600000	1600000	1800000	1600000
Q9HBB2	Aconitate hydratase	24000000	12000000	24000000	12000000	12000000	12000000	430000	2100000	12000000	24000000	1700000	1700000	5500000	4600000	5500000	5500000	5500000	1400000	1400000	20000000	7000000	1900000	1900000	1900000	1900000	7200000	14000000	13000000	1200000	41000000	1600000	1600000	1600000	1600000	1800000	1600000
G5BZS4	Actin, alpha cardiac muscle 1	920000	920000	920000	920000	920000	920000	920000	71000000	920000	920000	920000	920000	1400000	2200000	1000000	1000000	2400000	1400000	2400000	20000000	20000000	20000000	21000000	21000000	21000000	1500000	1500000	3900000	3900000	3900000	3900000	5900000	5900000	2200000	2200000	5900000
P68136	Actin, alpha skeletal muscle	920000	920000	920000	920000	920000	920000	920000	81000000	920000	920000	920000	920000	5500000	4300000	5500000	5500000	5500000	5500000	5500000	5800000	5800000	5800000	20000000	20000000	20000000	1500000	1500000	1500000	1500000	1500000	1500000	2100000	2100000	1200000	1200000	2100000
A0A0G2K4M6	Actin, aortic smooth muscle	920000	920000	920000	920000	920000	920000	12000000	2200000	920000	920000	920000	920000	1200000	2200000	930000	930000	930000	1200000	930000	2100000	2100000	2100000	2100000	2100000	2100000	7900000	7900000	7900000	7900000	7900000	7900000	5900000	5900000	1200000	1200000	5900000
D3ZRN3	Actin, beta-like 2	920000	920000	920000	920000	920000	920000	13000000	430000	920000	920000	920000	920000	3200000	58000000	3200000	3200000	2400000	3200000	2400000	2900000	2900000	2900000	4100000	2400000	2400000	6600000	6600000	2800000	3900000	3900000	3900000	5900000	5900000	1200000	1200000	5900000
P60711	Actin, cytoplasmic 1	920000	920000	920000	920000	920000	920000	20000000	510000	920000	920000	920000	920000	2200000	2400000	2200000	2200000	2200000	2400000	1200000	1700000	21000000	21000000	21000000	20000000	2600000	3900000	3900000	3900000	3900000	3900000	3900000	310000	310000	1200000	1200000	310000
A0A091DXD4	Actin, cytoplasmic 2	920000	920000	920000	920000	920000	920000	20000000	590000	920000	920000	920000	920000	58000000	3200000	58000000	58000000	58000000	58000000	58000000	3200000	21000000	21000000	21000000	21000000	21000000	41000000	41000000	41000000	41000000	550000	550000	140000	140000	140000	140000	140000
A0A0S3NTB0	Actin, gamma	920000	920000	920000	920000	920000	920000	30000000	870000000	920000	920000	920000	920000	5500000	2400000	5500000	5500000	5500000	5500000	5500000	20000000	20000000	20000000	20000000	20000000	20000000	550000	1200000	1200000	1200000	1200000	1200000	29000000	29000000	1200000	1200000	29000000
A0A1S3F056	actin, muscle-like	920000	920000	920000	920000	920000	920000	81000000	1800000	920000	920000	920000	920000	2200000	2200000	1100000	1100000	2200000	5500000	58000000	7000000	20000000	2600000	21000000	21000000	21000000	1500000	1500000	1500000	1500000	1500000	1500000	310000	890000	890000	890000	310000
A0A0W4ZFD7	Actin-1	920000	920000	920000	920000	920000	920000	81000000	940000	920000	920000	920000	920000	2200000	2400000	2200000	1100000	5500000	5500000	2200000	3200000	20000000	2400000	20000000	20000000	20000000	7200000	7200000	1500000	2400000	1500000	1500000	340000	340000	400000	5600000	5600000
G5AXS0	Actin-depolymerizing factor	820000	820000	820000	820000	820000	820000	920000	30000000	820000	820000	820000	820000	2200000	2200000	1100000	1300000	2200000	5500000	2200000	2800000	21000000	21000000	1700000	1700000	1700000	1600000	1600000	1600000	1600000	1600000	1600000	1900000	1900000	1200000	1200000	1900000
B4DXW1	Actin-related protein 3	8800000	2600000	8800000	2600000	450000	3300000	450000	12000000	450000	8800000	3300000	7900000	1400000	680000	8200000	12000000	5500000	1400000	4300000	3200000	3200000	1500000	7400000	2000000	2000000	4600000	1700000	4600000	450000	450000	7200000	19000000	19000000	980000	960000	19000000
Q9P1U1	Actin-related protein 3B	8800000	2600000	8800000	2600000	450000	3300000	450000	13000000	450000	8800000	3300000	7900000	5500000	680000	8200000	12000000	5500000	1100000	4300000	2100000	2100000	1500000	7400000	7400000	7400000	4600000	1700000	4600000	450000	450000	7200000	10000000	10000000	980000	960000	10000000
A0A0A0MTI9	Actin-related protein 3C	8800000	2600000	8800000	2600000	450000	3300000	450000	15000000	450000	8800000	3300000	7900000	5500000	680000	8200000	12000000	1200000	1400000	4300000	3200000	3200000	1500000	7400000	7400000	7400000	4600000	1700000	4600000	450000	450000	7200000	10000000	10000000	830000	960000	10000000
A0A0P6JFP4	Activation peptide fragment 1	1000000	1000000	1000000	1000000	1000000	1000000	21000000	920000	180000	180000	1000000	1000000	2400000	58000000	1100000	1100000	2400000	2200000	2200000	2700000	20000000	20000000	4100000	21000000	21000000	1100000	4600000	1100000	1100000	1100000	1500000	980000	980000	1200000	1200000	980000
Q96D30	ADD1 protein	25000000	4700000	18000000	4700000	4600000	17000000	30000000	940000	4600000	18000000	17000000	24000000	2200000	2400000	31000000	15000000	15000000	2200000	32000000	5600000	5600000	2000000	4200000	4200000	4200000	41000000	1900000	41000000	21000000	21000000	15000000	1300000	1300000	1800000	1300000	2300000
P07741	Adenine phosphoribosyltransferase	210000000	210000000	210000000	210000000	210000000	510000	11000000	1600000	940000	940000	510000	510000	2200000	5500000	2200000	660000	2200000	2200000	760000	2100000	2100000	2600000	2400000	2400000	21000000	1900000	1900000	1900000	360000	360000	360000	890000	890000	6600000	6600000	890000
P23526	Adenosylhomocysteinase	19000000	19000000	19000000	19000000	1200000	1500000	3800000	940000	19000000	19000000	1500000	4000000	2200000	2000000	470000	470000	470000	2200000	990000	5800000	5800000	5800000	3200000	4100000	4100000	1800000	1800000	12000000	12000000	12000000	1600000	560000	340000	340000	2200000	560000
P00568	Adenylate kinase	34000000	15000000	34000000	15000000	15000000	15000000	430000	710000	15000000	34000000	34000000	34000000	19000000	2400000	19000000	19000000	3200000	5500000	2200000	2100000	2100000	6000000	4100000	4100000	4100000	1500000	17000000	17000000	17000000	17000000	3000000	3000000	3000000	6500000	2400000	3000000
Q53EY8	Adenylate kinase 1	34000000	15000000	34000000	15000000	15000000	15000000	12000000	710000	15000000	34000000	34000000	34000000	3200000	2400000	3200000	3200000	1200000	5500000	1400000	2700000	2700000	6000000	6000000	20000000	20000000	2400000	17000000	3900000	1500000	1500000	3000000	3000000	3000000	6500000	2400000	3000000
P54819	Adenylate kinase 2	12000000	3200000	12000000	3200000	3200000	3200000	20000000	430000	3200000	12000000	12000000	12000000	19000000	1900000	470000	470000	470000	19000000	470000	3200000	3200000	3900000	3900000	3900000	3900000	3900000	9800000	2700000	2700000	5400000	5400000	1900000	4900000	4900000	3100000	1900000
P30520	Adenylosuccinate synthetase	34000000	15000000	34000000	15000000	15000000	15000000	510000	19000000	15000000	34000000	34000000	34000000	19000000	2400000	19000000	19000000	19000000	660000	660000	4100000	4100000	6000000	35000000	20000000	35000000	1500000	3900000	3900000	1500000	1500000	3000000	3000000	3000000	6500000	2400000	3000000
Q5T0R7	Adenylyl cyclase-associated protein	210000000	30000000	210000000	30000000	30000000	30000000	5500000	4500000	30000000	210000000	210000000	210000000	1100000	2000000	470000	470000	58000000	2200000	2200000	2100000	2100000	930000	1500000	1500000	1500000	5400000	1400000	1400000	1400000	2700000	8700000	8700000	8700000	8700000	8700000	8700000
Q9HDC9	Adipocyte plasma membrane-associated protein	260000000	260000000	260000000	260000000	260000000	250000	940000	11000000	940000	940000	250000	250000	19000000	58000000	3400000	5500000	19000000	19000000	19000000	2900000	2000000	21000000	1600000	21000000	21000000	7200000	1500000	7200000	7200000	7200000	690000	538696	538696	370000	24000000	24000000
G3V7N9	Adiponectin A	4500000	4500000	4500000	4500000	4500000	4500000	710000	940000	4500000	4500000	4500000	4500000	1400000	2200000	1000000	1000000	1000000	1400000	1000000	3200000	2600000	21000000	21000000	21000000	21000000	550000	1200000	7900000	7900000	9600000	9600000	140000	21000000	1200000	630000	140000
Q10588	ADP-ribosyl cyclase/cyclic ADP-ribose hydrolase 2	310000000	310000000	310000000	310000000	310000000	250000	940000	11000000	940000	940000	250000	250000	2400000	930000	3400000	660000	2400000	2400000	2400000	4100000	4100000	4100000	4100000	2100000	2100000	7900000	7900000	1700000	1700000	5600000	690000	1800000	1800000	440000	440000	1800000
P61204	ADP-ribosylation factor 3	440000000	440000000	440000000	440000000	440000000	250000	940000	11000000	940000	940000	250000	250000	2400000	58000000	3400000	1200000	2400000	1100000	1100000	2700000	2700000	21000000	35000000	35000000	35000000	7900000	7900000	3900000	13000000	2800000	690000	850000	850000	960000	8700000	8700000
C9JAK5	ADP-ribosylation factor 4	440000000	440000000	440000000	440000000	440000000	250000	3700000	11000000	940000	940000	250000	250000	2200000	58000000	3400000	3200000	2200000	1400000	1400000	7000000	7000000	21000000	21000000	2900000	2900000	550000	7200000	1500000	7200000	1500000	690000	850000	850000	960000	8700000	8700000
P62330	ADP-ribosylation factor 6	440000000	440000000	440000000	440000000	440000000	250000	17000000	11000000	940000	940000	250000	250000	2200000	1100000	3400000	19000000	2200000	1400000	1400000	6300000	20000000	20000000	20000000	20000000	20000000	1500000	1500000	14000000	3900000	5600000	690000	850000	850000	6600000	6600000	850000
P43652	Afamin	3500000	2900000	3500000	2900000	680000	260000	260000	12000000	260000	2700000	2900000	2900000	58000000	2800000	2700000	2700000	1400000	58000000	2100000	540000	540000	540000	3100000	21000000	21000000	1300000	1700000	1300000	1300000	1300000	500000	480000	480000	440000	440000	480000
D3GKD8	A-gamma globin	440000000	440000000	440000000	440000000	440000000	440000000	1600000	550000	24000000	24000000	24000000	24000000	19000000	2200000	1100000	1100000	2200000	58000000	2200000	21000000	21000000	21000000	35000000	21000000	21000000	1700000	7200000	6600000	6600000	6600000	6600000	5900000	5900000	400000	1600000	1600000
Q14474	A-gamma-hemoglobin	870000000	870000000	870000000	870000000	870000000	340000	11000000	180000	940000	940000	340000	340000	19000000	58000000	2500000	1100000	3200000	2200000	1700000	4100000	4100000	4100000	4100000	4100000	20000000	810000	2400000	810000	810000	810000	840000	980000	980000	980000	980000	980000
Q1XBU6	Aging-associated protein 14b	1900000000	1900000000	1900000000	1900000000	1900000000	340000	11000000	250000	940000	940000	340000	340000	19000000	58000000	2900000	1400000	19000000	2200000	2200000	4100000	4100000	4100000	4100000	35000000	21000000	14000000	550000	2800000	2800000	2800000	960000	980000	980000	1200000	1200000	980000
Q13727	AHNAK-related protein	71000000	71000000	71000000	71000000	71000000	71000000	11000000	4700000	9700000	9700000	9700000	9700000	58000000	3200000	1400000	1400000	1400000	58000000	1400000	5800000	5800000	1600000	21000000	21000000	21000000	3900000	3900000	2800000	2800000	2800000	2800000	5900000	5900000	990000	5600000	5600000
P02770	Albumin	140000000	520000000	14000000	520000000	150000000	150000000	112000000	82000000	450000000	150000000	92000000	520000000	94000000	140000000	170000000	170000000	220000000	940000000	490000000	200000000	200000000	200000000	210000000	59000000	5900000	200000000	120000000	200000000	200000000	200000000	39000000	65000000	65000000	290000000	1100000000	56000000
P15121	Aldose reductase	6500000	6500000	6500000	6500000	6500000	6500000	3700000	480000	6500000	6500000	6500000	6500000	2400000	5500000	2400000	2400000	2400000	2400000	2400000	2900000	2900000	2400000	21000000	21000000	21000000	20000000	20000000	7200000	6600000	7200000	7200000	140000	29000000	400000	6400000	140000
P01023	Alpha 2 macroglobulin	4700000	4700000	4700000	4700000	4700000	2300000	820000	9200000	4700000	4700000	2300000	13000000	2200000	68000000	1900000	14000000	5500000	5500000	780000	3200000	3200000	1600000	1600000	1600000	1600000	7200000	7200000	550000	20000000	20000000	20000000	1500000	1500000	1200000	1200000	1500000
V9H1D9	Alpha globin	6500000	6500000	6500000	6500000	6500000	6500000	3700000	9700000	6500000	6500000	6500000	6500000	19000000	58000000	19000000	19000000	58000000	19000000	58000000	5800000	5800000	5800000	5800000	5800000	5800000	3900000	550000	2800000	550000	550000	550000	310000	310000	960000	6400000	310000
Q59GM9	Alpha-1,4 glucan phosphorylase	6500000	6500000	6500000	6500000	6500000	6500000	3700000	1000000	6500000	6500000	6500000	6500000	19000000	2800000	19000000	19000000	19000000	19000000	19000000	21000000	21000000	21000000	810000	21000000	21000000	1700000	1700000	2400000	7200000	2400000	2400000	980000	980000	1200000	6400000	980000
P02763	Alpha-1-acid glycoprotein 1	30000000	30000000	30000000	30000000	30000000	30000000	11000000	11000000	1000000	1000000	320000	320000	660000	2200000	410000	410000	5500000	2400000	1100000	21000000	21000000	810000	21000000	21000000	21000000	7900000	7900000	5400000	5400000	5400000	5400000	310000	310000	1200000	1200000	310000
P19652	Alpha-1-acid glycoprotein 2	30000000	30000000	30000000	30000000	30000000	30000000	11000000	11000000	1000000	1000000	320000	320000	1200000	58000000	410000	410000	660000	2400000	660000	2400000	2400000	2400000	2400000	2400000	2400000	3900000	3900000	3900000	3900000	3900000	3900000	140000	140000	960000	8500000	8500000
G3V3A0	Alpha-1-antichymotrypsin	6500000	6500000	6500000	6500000	6500000	6500000	4500000	1000000	6500000	6500000	6500000	6500000	2400000	2200000	2400000	2400000	2200000	2400000	2200000	21000000	6300000	6300000	6300000	6300000	6300000	550000	7200000	6600000	550000	550000	550000	1900000	1900000	1200000	6400000	1900000
Q80ZA3	Alpha-2 antiplasmin	4600000	880000	4600000	880000	880000	880000	880000	30000000	880000	4600000	4600000	4600000	2400000	2400000	2400000	660000	2200000	19000000	2200000	21000000	2000000	2000000	20000000	2400000	2400000	3900000	3900000	3900000	3900000	3900000	3900000	2100000	2100000	1200000	520000	2100000
P12814	Alpha-actinin-1	920000	920000	920000	920000	920000	920000	430000	710000	920000	920000	920000	920000	2400000	3200000	2400000	2400000	2400000	2400000	2400000	21000000	21000000	21000000	21000000	21000000	21000000	3900000	5400000	20000000	5400000	3900000	3900000	29000000	29000000	2200000	2200000	29000000
P35609	Alpha-actinin-2	920000	920000	920000	920000	920000	920000	430000	710000	920000	920000	920000	920000	2400000	5500000	2400000	2400000	2400000	2400000	2400000	870000	35000000	35000000	35000000	200000	20000000	1500000	1500000	1500000	1500000	1500000	1500000	1500000	1500000	1200000	1200000	1500000
Q08043	Alpha-actinin-3	81000000	81000000	81000000	81000000	81000000	81000000	11000000	1900000	1000000	1000000	1000000	1000000	2400000	19000000	2400000	2400000	2400000	3200000	1400000	4100000	4100000	2400000	2400000	35000000	35000000	5400000	5400000	5400000	5400000	550000	550000	310000	220000	1200000	92000000	92000000
F5GXS2	Alpha-actinin-4	71000000	71000000	71000000	71000000	71000000	71000000	11000000	1900000	480000	480000	480000	480000	58000000	660000	660000	660000	660000	58000000	660000	5800000	5800000	810000	21000000	2400000	2400000	1500000	1500000	3900000	3900000	3900000	3900000	24000000	5900000	1200000	1200000	24000000
P06733	Alpha-enolase	7600000	7600000	7600000	7600000	7600000	7600000	940000	11000000	1000000	1000000	1000000	1000000	2200000	5500000	2200000	2400000	2400000	2200000	2200000	2100000	2100000	21000000	35000000	21000000	2000000	5400000	5400000	5400000	5400000	5400000	5400000	310000	310000	1200000	1200000	310000
H0YDL7	Alpha-ketoglutarate-dependent dioxygenase lkB	920000	920000	920000	920000	920000	920000	2200000	940000	920000	920000	920000	920000	2200000	2200000	1300000	2200000	5500000	2200000	5500000	21000000	21000000	21000000	20000000	4100000	4100000	7200000	7200000	550000	550000	6600000	6600000	1900000	1900000	1200000	1200000	1900000
A0A564YWN0	Amino acid transporter	19000000	19000000	19000000	19000000	1200000	1500000	480000	7300000	19000000	19000000	1500000	4000000	58000000	2000000	470000	470000	58000000	58000000	990000	490000	490000	2400000	3200000	3200000	3200000	1800000	1800000	12000000	12000000	12000000	1600000	980000	340000	340000	2200000	980000
Q01432	AMP deaminase 3	920000	920000	920000	920000	920000	920000	2200000	3000000	920000	920000	920000	920000	2200000	2200000	1300000	58000000	5500000	2200000	2400000	490000	490000	490000	490000	490000	490000	550000	14000000	41000000	7900000	7900000	7900000	630000	140000	140000	140000	630000
P01019	Angiotensinogen	80000000	13000000	80000000	13000000	13000000	13000000	940000	710000	13000000	80000000	80000000	80000000	1200000	3000000	1200000	1200000	660000	5500000	1600000	1600000	1600000	12000000	5200000	1600000	1600000	7200000	5100000	2400000	6600000	7200000	5800000	5800000	5800000	5900000	6500000	5800000
P00762	Anionic trypsin-1	2500000	2500000	2500000	2500000	2500000	2500000	5500000	4500000	2500000	2500000	2500000	2500000	1200000	58000000	1200000	470000	470000	1200000	1400000	600000	2100000	2700000	2100000	810000	810000	2400000	2400000	1500000	7200000	2400000	2400000	140000	2300000	2300000	6300000	140000
P04083	Annexin A1	30000000	30000000	30000000	30000000	30000000	30000000	940000	11000000	1000000	1000000	1000000	1000000	1400000	2200000	1000000	1000000	58000000	1400000	58000000	1500000	21000000	21000000	21000000	21000000	21000000	2800000	2800000	3900000	3900000	13000000	13000000	310000	310000	1200000	1200000	310000
H0Y6E1	Annexin A11	11000000	11000000	11000000	11000000	11000000	11000000	4700000	560000	33000000	33000000	33000000	33000000	3200000	4300000	3200000	3200000	3200000	1400000	1400000	21000000	21000000	2400000	5800000	4100000	4100000	7200000	7200000	7200000	5400000	7200000	7200000	2100000	2100000	2100000	2100000	2100000
H0YKN4	Annexin A2	60000000	60000000	60000000	60000000	60000000	60000000	11000000	180000	1000000	1000000	320000	320000	3200000	58000000	410000	410000	1200000	2200000	2200000	20000000	20000000	20000000	20000000	20000000	20000000	2400000	2400000	1500000	1500000	1500000	1500000	140000	140000	140000	140000	140000
P12429	Annexin A3	11000000	11000000	11000000	11000000	11000000	11000000	11000000	11000000	9700000	9700000	320000	320000	5500000	58000000	410000	410000	5500000	19000000	2200000	20000000	20000000	20000000	21000000	20000000	20000000	550000	7200000	1500000	2400000	1500000	1500000	5900000	5900000	2200000	2200000	5900000
P09525	Annexin A4	60000000	60000000	60000000	60000000	60000000	60000000	11000000	4700000	9700000	9700000	9700000	9700000	660000	2200000	920000	2200000	2200000	660000	2200000	20000000	20000000	21000000	21000000	21000000	21000000	5600000	6600000	6600000	6600000	6600000	6600000	120000000	120000000	1200000	1200000	120000000
D6RCN3	Annexin A5	30000000	30000000	30000000	30000000	30000000	30000000	940000	11000000	1000000	1000000	1000000	1000000	2200000	5500000	2200000	2200000	1400000	2200000	1400000	810000	810000	810000	21000000	20000000	2000000	6600000	6600000	6600000	6600000	6600000	6600000	310000	310000	1200000	1200000	310000
E5RFF0	Annexin A6	11000000	11000000	11000000	11000000	11000000	11000000	940000	11000000	9700000	9700000	9700000	9700000	58000000	2200000	470000	470000	470000	58000000	470000	2900000	2900000	2400000	2400000	2400000	2400000	20000000	20000000	7200000	7200000	7200000	7200000	5900000	5900000	1200000	1200000	5900000
Q08AJ6	ANP32A protein	7600000	7600000	7600000	7600000	7600000	7600000	1900000000	11000000	1000000	1000000	1000000	1000000	1200000	1100000	1100000	1100000	1100000	1200000	1100000	2400000	2400000	2500000	2500000	2500000	2500000	41000000	41000000	41000000	3900000	550000	550000	2100000	2100000	1200000	1200000	2100000
Q5M7T5	Antithrombin-III	210000000	30000000	210000000	30000000	30000000	30000000	2100000	4500000	30000000	210000000	210000000	210000000	58000000	2000000	470000	470000	2200000	2400000	660000	21000000	21000000	930000	1500000	21000000	21000000	2700000	1400000	2400000	7200000	2400000	8700000	8700000	8700000	8700000	8700000	8700000
A0A158R1C3	AO66 ankyrin	820000	820000	670000	670000	670000	670000	670000	20000000	670000	340000	340000	820000	19000000	1300000	1300000	5500000	2400000	1200000	1200000	2100000	2000000	2000000	2000000	2600000	2600000	1200000	7200000	1200000	1200000	1200000	24000000	24000000	24000000	24000000	26000000	24000000
Q10567	AP-1 complex subunit beta-1	7600000	7600000	7600000	7600000	7600000	7600000	940000	11000000	1000000	1000000	1000000	1000000	1400000	470000	470000	470000	470000	1400000	470000	2900000	1700000	1700000	20000000	200000	20000000	1500000	1500000	1500000	1500000	1500000	1500000	120000000	120000000	440000	440000	120000000
O43747	AP-1 complex subunit gamma-1	81000000	81000000	81000000	81000000	81000000	81000000	11000000	84000000	1000000	1000000	1000000	1000000	1400000	58000000	1400000	1400000	1400000	1200000	1200000	3200000	3200000	2100000	2100000	1700000	1700000	550000	2400000	2400000	5400000	7200000	7200000	5900000	5900000	440000	440000	5900000
O95782	AP-2 complex subunit alpha-1	3900000	3900000	710000	710000	710000	710000	3800000	17000000	710000	710000	710000	3900000	2400000	58000000	2400000	2400000	2400000	2400000	1300000	20000000	6300000	2100000	2100000	2100000	2100000	550000	5600000	6600000	7600000	7600000	7600000	310000	140000	440000	1800000	1800000
P63010	AP-2 complex subunit beta	3900000	3900000	710000	710000	710000	710000	3800000	3700000	710000	710000	710000	3900000	2400000	58000000	2400000	2400000	2400000	2400000	1300000	2400000	2100000	21000000	2400000	20000000	20000000	7200000	7200000	1500000	1500000	1500000	1500000	5900000	5900000	370000	370000	5900000
Q13784	APOA4 protein	3900000	3900000	710000	710000	710000	710000	3800000	940000	710000	710000	710000	3900000	2200000	2200000	2400000	2400000	2400000	2200000	1300000	4200000	4200000	21000000	21000000	2000000	35000000	13000000	13000000	13000000	1500000	1500000	1500000	2100000	2100000	1200000	1200000	2100000
Q9Y355	Apolipoprotein A1	81000000	81000000	81000000	81000000	81000000	81000000	11000000	150000000	1000000	1000000	1000000	1000000	660000	2200000	810000	1400000	1400000	3200000	1400000	4100000	20000000	20000000	20000000	20000000	20000000	20000000	20000000	7200000	20000000	5600000	5600000	980000	980000	1200000	1200000	980000
V9GYM3	Apolipoprotein A-II	12000000	2300000	12000000	2300000	2900000	2900000	19000000	3800000	12000000	12000000	2300000	1300000	2400000	9200000	3400000	6000000	1400000	2400000	630000	2400000	2400000	2400000	2700000	1200000	1200000	3300000	3300000	3300000	3300000	3300000	5900000	5900000	5900000	960000	9500000	5900000
A0A091DG24	Apolipoprotein A-IV	210000000	210000000	210000000	210000000	210000000	210000000	1600000	550000	24000000	24000000	24000000	24000000	2200000	1400000	2200000	2200000	2400000	2200000	2400000	2700000	2700000	1600000	1600000	1600000	1600000	6600000	6600000	6600000	6600000	1200000	1200000	140000	220000	1200000	4000000	140000
F1M6Z1	Apolipoprotein B-100	180000	180000	180000	180000	180000	180000	940000	11000000	340000	340000	340000	340000	19000000	19000000	1400000	1400000	1400000	58000000	1400000	2700000	2700000	21000000	21000000	21000000	21000000	5600000	7600000	550000	7900000	2800000	2800000	1500000	1500000	1200000	1200000	1500000
P02656	Apolipoprotein C-III	33000000	7000000	33000000	7000000	7000000	7000000	55000000	870000000	7000000	33000000	33000000	33000000	58000000	8400000	610000	610000	610000	58000000	610000	21000000	21000000	20000000	2000000	2400000	2400000	14000000	73000000	14000000	14000000	14000000	1700000	1700000	1700000	1700000	20000000	6900000
P02649	Apolipoprotein E	13000000	1800000	13000000	1800000	2700000	2700000	550000	920000	9900000	9900000	1800000	1800000	19000000	10000000	19000000	19000000	19000000	19000000	19000000	21000000	21000000	21000000	21000000	21000000	21000000	1200000	7200000	20000000	1200000	3900000	3900000	5900000	5900000	1700000	1300000	5900000
Q5I0M1	Apolipoprotein H	6500000	6500000	6500000	6500000	6500000	6500000	4500000	1000000	6500000	6500000	6500000	6500000	2200000	58000000	2200000	5500000	2200000	2200000	2200000	5800000	21000000	2400000	2400000	2400000	2400000	20000000	20000000	7200000	7200000	2700000	2700000	500000	500000	1200000	6400000	500000
O14791	Apolipoprotein L1	17000000	3400000	17000000	3400000	3400000	3400000	30000000	590000	3400000	17000000	3300000	3900000	2200000	5500000	3700000	480000	480000	2200000	7100000	5800000	5800000	2700000	2400000	2400000	5800000	6700000	1500000	6700000	4400000	4400000	2700000	2300000	2300000	2300000	2300000	2300000
Q9ULZ3	Apoptosis-associated speck-like protein	74000000	55000000	74000000	55000000	55000000	55000000	5500000	4500000	55000000	74000000	6800000	700000	1400000	6200000	420000	510000	510000	2200000	2200000	3200000	2100000	4200000	5500000	2900000	2900000	5300000	15000000	170000	170000	170000	6600000	6600000	6600000	8600000	9000000	6600000
P18054	Arachidonate 12-lipoxygenase	9600000	9600000	9600000	9600000	9600000	9600000	940000	1900000000	9600000	9600000	9600000	9600000	660000	5500000	420000	510000	510000	660000	510000	810000	810000	21000000	2900000	21000000	2900000	5300000	6900000	6900000	6900000	6900000	550000	550000	550000	4500000	5200000	550000
P05089	Arginase-1	130000000	130000000	130000000	130000000	130000000	130000000	530000	550000	21000000	21000000	21000000	21000000	660000	2200000	660000	2200000	3200000	660000	3200000	2100000	2600000	2600000	2600000	1700000	1700000	6600000	6600000	2400000	1700000	550000	550000	120000000	120000000	1200000	1200000	120000000
P17174	Aspartate aminotransferase	8900000	560000	8900000	560000	560000	560000	560000	15000000	560000	8900000	8900000	8900000	660000	470000	470000	1100000	3200000	5500000	2200000	2100000	2100000	2100000	2100000	2100000	2000000	1700000	1700000	1700000	1700000	1700000	440000	440000	440000	480000	440000	440000
P14868	Aspartate-tRNA ligase	8900000	560000	8900000	560000	560000	560000	560000	20000000	560000	8900000	8900000	8900000	1200000	470000	470000	1400000	19000000	5500000	2200000	2100000	20000000	20000000	20000000	20000000	20000000	20000000	20000000	7200000	20000000	2700000	440000	440000	440000	480000	440000	440000
D3DP78	Aspartyl-tRNA synthetase	8900000	560000	8900000	560000	560000	560000	560000	20000000	560000	8900000	8900000	8900000	3200000	470000	470000	1400000	19000000	5500000	2200000	20000000	2000000	2000000	2400000	2400000	2400000	1500000	1500000	1500000	3900000	5600000	440000	440000	440000	480000	440000	440000
V9HW31	ATP synthase subunit beta	24000000	24000000	24000000	24000000	24000000	24000000	17000000	11000000	1000000	1000000	1000000	1000000	660000	2200000	660000	660000	2200000	660000	2200000	4100000	35000000	35000000	20000000	2400000	2400000	3900000	3900000	14000000	14000000	3900000	3900000	830000	830000	1200000	24000000	24000000
P53396	ATP-citrate synthase	18000000	18000000	18000000	18000000	18000000	18000000	3700000	11000000	480000	480000	480000	480000	2200000	58000000	2200000	2200000	2200000	2200000	2200000	2100000	2100000	2100000	21000000	21000000	21000000	14000000	14000000	7200000	5400000	7200000	7200000	140000	140000	990000	24000000	24000000
Q9QY16	ATP-dependent RNA helicase	11000000	11000000	11000000	11000000	11000000	11000000	1600000	560000	30000000	30000000	30000000	30000000	19000000	1300000	1300000	1300000	2200000	2800000	1400000	5800000	5800000	2400000	2400000	2400000	2400000	550000	1500000	550000	2700000	7900000	290000	290000	290000	2100000	290000	290000
Q99J86	Attractin	7600000	7600000	7600000	7600000	7600000	7600000	11000000	11000000	480000	480000	320000	320000	5500000	58000000	410000	58000000	5500000	19000000	2200000	20000000	2400000	2400000	2600000	2600000	2600000	1500000	1500000	3900000	3900000	3900000	3900000	220000	2100000	1200000	1200000	220000
A0A514M7C8	Beta fibrinogen	7600000	7600000	7600000	7600000	7600000	7600000	940000	11000000	1000000	1000000	1000000	1000000	2200000	5500000	2200000	2200000	2200000	2200000	2200000	3200000	2000000	1600000	20000000	21000000	21000000	7200000	7200000	1500000	2400000	1500000	1500000	340000	980000	1200000	1200000	340000
Q6VFQ5	Beta globin	4200000	4200000	3700000	3700000	3700000	950000	1000000	11000000	3700000	3700000	950000	4200000	1400000	5500000	3000000	3000000	1400000	1400000	2800000	5800000	5800000	5800000	20000000	20000000	20000000	3100000	3100000	3100000	3300000	3300000	3000000	1700000	1700000	2200000	2200000	1700000
A7XZE4	Beta tropomyosin isoform	33000000	33000000	33000000	33000000	33000000	33000000	7300000	11000000	480000	480000	480000	480000	660000	5500000	660000	660000	660000	660000	660000	2400000	2400000	2400000	21000000	21000000	21000000	7900000	5400000	14000000	14000000	14000000	14000000	5900000	5900000	440000	2000000	5900000
G5BQA9	Beta-1 metal-binding globulin	9700000	9700000	9700000	9700000	9700000	9700000	920000	12000000	250000	250000	9700000	9700000	660000	2200000	470000	470000	19000000	19000000	2200000	2900000	2900000	2900000	2900000	20000000	20000000	2400000	2400000	2400000	1500000	1500000	1500000	2100000	2100000	2100000	2100000	2100000
P26644	Beta-2-glycoprotein 1	6500000	6500000	6500000	6500000	6500000	6500000	4500000	940000	6500000	6500000	6500000	6500000	2200000	1300000	1300000	5500000	2200000	2200000	2200000	4100000	4100000	4100000	4100000	20000000	20000000	1500000	1500000	5600000	3900000	7900000	7900000	1500000	1500000	1200000	6400000	1500000
P61769	Beta-2-microglobulin	2200000	2200000	2200000	2200000	2200000	2200000	4500000	1000000	590000	590000	590000	2200000	58000000	5500000	2000000	2000000	660000	3200000	1200000	6300000	810000	810000	810000	3200000	5800000	1100000	1300000	1100000	1100000	1100000	1100000	2100000	2100000	1200000	1200000	2100000
A4UCU2	Beta-4 tubulin	4700000	4700000	4500000	4500000	4500000	1100000	940000	11000000	4500000	4500000	1100000	4700000	5500000	58000000	3000000	3000000	5500000	5500000	2700000	3200000	2000000	2000000	810000	21000000	21000000	1600000	1600000	1600000	5200000	5200000	3500000	1700000	1700000	400000	24000000	24000000
A1Z0K8	Beta-actin	920000	920000	920000	920000	920000	920000	2200000	940000	920000	920000	920000	920000	2400000	5500000	2400000	2400000	2400000	2400000	2400000	4100000	4100000	2500000	2500000	2500000	2500000	7600000	7600000	7600000	7600000	2700000	2700000	320000	320000	990000	6900000	6900000
A0A1S3FWJ7	beta-actin-like protein 2	920000	920000	920000	920000	920000	920000	2200000	2100000	920000	920000	920000	920000	2200000	2200000	1300000	1300000	1300000	2200000	2200000	2700000	2100000	2100000	810000	2000000	2000000	2800000	2800000	7200000	14000000	2700000	2700000	140000	140000	1200000	1200000	140000
P42025	Beta-centractin	4700000	4700000	4500000	4500000	4500000	1100000	940000	11000000	4500000	4500000	1100000	4700000	5500000	58000000	3000000	1100000	5500000	5500000	2700000	2100000	2100000	2100000	21000000	1700000	2100000	1600000	1600000	1600000	5200000	5200000	3500000	1700000	1700000	400000	92000000	92000000
P13929	Beta-enolase	4200000	4200000	3700000	3700000	3700000	950000	1000000	7300000	3700000	3700000	950000	4200000	1400000	5500000	3000000	3000000	1400000	1400000	2800000	5800000	5800000	2400000	2400000	21000000	2000000	3100000	3100000	3100000	3300000	3300000	3000000	1600000	1600000	960000	6600000	6600000
A0A2P1NU51	Beta-fibrinogen	11000000	11000000	11000000	11000000	11000000	11000000	4700000	690000	33000000	33000000	33000000	33000000	19000000	2200000	19000000	19000000	19000000	19000000	19000000	20000000	20000000	810000	810000	21000000	21000000	6600000	6600000	5400000	5400000	5400000	5400000	2100000	2100000	5600000	5600000	2100000
G3M708	Brain-derived neurotrophic factor	2800000	2800000	2800000	2800000	2800000	2800000	1800000	1900000	2800000	2800000	2800000	2800000	2200000	1100000	1100000	2200000	2200000	2200000	5500000	2100000	2100000	1600000	21000000	21000000	21000000	3900000	3900000	2700000	7200000	550000	550000	29000000	29000000	960000	8500000	8500000
Q6MG74	C3/C5 convertase	3900000	3900000	710000	710000	710000	710000	3800000	940000	710000	710000	710000	3900000	2200000	2200000	2400000	2400000	2400000	2200000	1300000	4100000	4100000	21000000	21000000	21000000	21000000	7200000	7200000	2800000	7200000	7200000	7200000	500000	500000	1200000	1200000	500000
M0RBF1	C3-beta-c	33000000	7000000	33000000	7000000	7000000	7000000	60000000	2100000	7000000	33000000	33000000	33000000	1100000	8400000	610000	610000	610000	1100000	610000	810000	21000000	20000000	2000000	2000000	2000000	2700000	73000000	5600000	3900000	1700000	1700000	1700000	1700000	1700000	20000000	6900000
A0A0G2JW12	C4a anaphylatoxin	30000000	30000000	30000000	30000000	30000000	30000000	940000	11000000	9700000	9700000	9700000	9700000	58000000	1400000	58000000	58000000	58000000	58000000	58000000	5800000	5800000	21000000	21000000	2000000	2000000	1700000	1700000	7200000	2800000	5400000	5400000	13000000	13000000	1200000	1200000	13000000
A0A024RDT3	Calcium binding protein 39-like	3600000	3600000	3000000	3000000	3000000	570000	940000	940000	3000000	3000000	570000	3600000	19000000	1400000	1800000	1800000	58000000	19000000	2700000	21000000	2600000	35000000	20000000	2400000	2400000	3300000	3300000	3300000	1400000	1400000	1500000	560000	560000	990000	990000	560000
B5BU41	Calcium/calmodulin-dependent protein kinase I	33000000	33000000	33000000	33000000	33000000	33000000	11000000	11000000	1000000	1000000	1000000	1000000	2200000	5500000	2200000	2200000	2200000	2200000	2200000	21000000	20000000	21000000	810000	21000000	810000	1500000	1500000	1500000	1500000	1500000	1500000	2100000	2100000	6600000	6600000	2100000
Q9Y376	Calcium-binding protein 39	33000000	33000000	33000000	33000000	33000000	33000000	11000000	180000	1000000	1000000	1000000	1000000	19000000	5500000	19000000	19000000	5500000	58000000	5500000	4100000	4100000	2100000	2100000	21000000	21000000	5400000	5400000	2400000	7200000	1500000	1500000	140000	140000	440000	1700000	1700000
A8K9K1	Calcium-transporting ATPase	34000000	34000000	34000000	34000000	34000000	34000000	11000000	250000	9700000	9700000	9700000	9700000	3200000	1400000	3200000	19000000	19000000	3200000	19000000	7000000	7000000	2500000	2500000	2500000	2500000	1200000	2400000	20000000	3900000	3900000	3900000	1900000	1900000	990000	300000	300000
Q9NYG1	Caldesmon 1	33000000	33000000	33000000	33000000	33000000	33000000	11000000	11000000	1000000	1000000	1000000	1000000	2200000	1400000	2200000	2200000	2200000	2200000	2200000	5800000	2100000	2100000	2500000	20000000	20000000	7200000	7200000	1500000	1500000	1500000	1500000	140000	1700000	1200000	1200000	140000
A0A024R580	Calpain 1	34000000	34000000	34000000	34000000	34000000	34000000	11000000	250000	9700000	9700000	9700000	9700000	19000000	2400000	19000000	3200000	2200000	58000000	2200000	2400000	21000000	2100000	2600000	21000000	21000000	7200000	1500000	7200000	7200000	7200000	7200000	140000	980000	1200000	1200000	140000
P00918	Carbonic anhydrase 2	20000000	20000000	20000000	20000000	20000000	20000000	3800000	940000	20000000	20000000	20000000	20000000	270000	1100000	1100000	1100000	1100000	270000	1100000	2100000	21000000	1300000	1300000	21000000	21000000	2400000	2400000	2400000	1500000	1500000	900000	900000	900000	1800000	3500000	900000
P16152	Carbonyl reductase [NADPH] 1	4500000	4500000	4500000	4500000	4500000	4500000	710000	940000	4500000	4500000	4500000	4500000	1400000	2200000	1000000	1000000	1000000	1400000	1000000	3200000	35000000	35000000	35000000	4100000	4100000	5600000	5600000	7200000	2700000	7200000	7200000	2100000	2100000	1200000	630000	2100000
Q9EQV8	Carboxypeptidase N catalytic chain	8900000	560000	8900000	560000	560000	560000	560000	20000000	560000	8900000	8900000	8900000	19000000	470000	470000	5500000	2400000	660000	660000	5800000	35000000	2500000	21000000	21000000	21000000	3900000	3900000	5600000	550000	5400000	440000	440000	440000	480000	440000	440000
P04040	Catalase	3000000	3000000	3000000	3000000	2100000	2100000	4500000	940000	2100000	2100000	2100000	3000000	1400000	2200000	2400000	6000000	19000000	1400000	1000000	4100000	35000000	2400000	2100000	810000	810000	3300000	3300000	3300000	3300000	3300000	9700000	8700000	8700000	6600000	6600000	8700000
A1XP52	Catecholamine-regulated protein 40	260000000	60000000	260000000	60000000	60000000	60000000	1800000	4500000	60000000	260000000	7700000	14000000	1400000	17000000	18000000	9900000	19000000	2200000	22000000	2400000	4200000	37000000	5400000	2700000	2700000	7600000	50000000	28000000	7400000	7400000	14000000	5500000	5500000	6300000	19000000	12000000
P49913	Cathelicidin antimicrobial peptide	39000000	39000000	39000000	39000000	39000000	39000000	11000000	1600000	1000000	1000000	1000000	1000000	2400000	2200000	2400000	19000000	19000000	2400000	19000000	21000000	21000000	21000000	20000000	20000000	20000000	2800000	2800000	7200000	7200000	7200000	7200000	1900000	1900000	1200000	1200000	1900000
F8WD96	Cathepsin D O	42000000	42000000	42000000	42000000	42000000	42000000	11000000	1600000	1000000	1000000	1000000	1000000	2200000	2200000	2200000	2200000	2200000	2200000	2200000	7000000	7000000	7000000	7000000	5800000	5800000	3900000	3900000	5400000	5600000	1700000	1700000	310000	1700000	1200000	1200000	310000
P08311	Cathepsin G	42000000	42000000	42000000	42000000	42000000	42000000	11000000	1600000	1000000	1000000	1000000	1000000	2200000	2200000	2000000	58000000	58000000	2200000	58000000	35000000	2100000	2100000	2100000	2100000	2100000	2300000	2300000	2300000	2300000	2300000	1300000	560000	140000	440000	440000	560000
P25774	Cathepsin S	74000000	74000000	74000000	74000000	74000000	74000000	11000000	1900000	480000	480000	480000	480000	2200000	2200000	2200000	2200000	19000000	19000000	2200000	21000000	21000000	21000000	21000000	21000000	21000000	3900000	3900000	2700000	5600000	2700000	2700000	140000	140000	140000	140000	140000
A0A0A1TSG4	CD47	7300000	940000	7300000	940000	940000	530000	11000000	1900000	7300000	7300000	940000	940000	660000	1000000	1100000	2200000	5500000	660000	2100000	810000	20000000	20000000	20000000	35000000	35000000	4400000	4400000	4400000	4400000	4400000	1500000	980000	980000	560000	1200000	980000
Q59F68	CD68 antigen variant	3700000	3700000	3700000	3700000	3700000	3700000	940000	940000	3700000	3700000	3700000	3700000	19000000	930000	930000	930000	930000	5500000	2200000	21000000	21000000	2400000	2400000	3200000	3200000	1700000	1700000	2400000	7200000	2400000	2400000	980000	140000	140000	550000	550000
P21926	CD9 antigen	1200000	1200000	1200000	1200000	530000	530000	550000	920000	530000	530000	1200000	1200000	58000000	5500000	58000000	58000000	1400000	58000000	1400000	21000000	21000000	2600000	2600000	2600000	20000000	520000	6700000	520000	520000	520000	520000	21000000	21000000	5600000	5600000	21000000
A0A024R7B7	CDC37 cell division cycle	6800000	2000000	6800000	2000000	2000000	2000000	15000000	430000	2000000	9900000	9900000	9900000	1200000	2200000	920000	920000	920000	1200000	920000	2700000	35000000	1300000	21000000	21000000	21000000	7900000	780000	1700000	1700000	550000	400000	400000	400000	400000	400000	400000
A0A024RAE4	Cell division cycle 42	550000	550000	550000	550000	550000	550000	920000	15000000	550000	550000	550000	550000	19000000	930000	930000	930000	2200000	2200000	2200000	5800000	5800000	2400000	2400000	20000000	20000000	20000000	20000000	20000000	3900000	14000000	14000000	5900000	5900000	990000	5600000	5600000
Q08ES8	Cell growth-inhibiting protein 34	550000	550000	550000	550000	550000	550000	920000	20000000	550000	550000	550000	550000	2400000	5500000	2400000	2400000	58000000	58000000	58000000	4100000	4100000	4100000	4100000	21000000	21000000	1200000	6700000	6700000	6700000	6700000	6700000	310000	29000000	440000	550000	550000
Q2TNB3	Cell migration-inducing protein 22	96000000	96000000	96000000	96000000	96000000	96000000	180000	250000	18000000	18000000	18000000	18000000	660000	58000000	660000	2200000	19000000	2200000	2200000	2400000	2400000	2600000	2600000	2600000	21000000	3900000	14000000	3900000	3900000	3900000	3900000	1900000	1900000	1900000	1900000	1900000
Q4V8C2	Centromere/kinetochore protein	33000000	33000000	33000000	33000000	33000000	33000000	7300000	11000000	9700000	9700000	9700000	9700000	2200000	2200000	2200000	2200000	2200000	2200000	58000000	4100000	4100000	4100000	4100000	4100000	4100000	7200000	7200000	1500000	1500000	1500000	1500000	24000000	24000000	24000000	2000000	24000000
Q66GT8	Centrosome protein	3600000	350000	3600000	350000	350000	350000	350000	12000000	350000	3600000	3600000	3600000	1100000	58000000	1100000	1100000	1400000	1100000	1400000	35000000	35000000	35000000	35000000	20000000	2900000	3900000	3900000	3900000	3900000	3900000	3900000	140000	140000	2200000	2200000	140000
A0A6M2DWT6	Ceramide transfer protein	33000000	33000000	33000000	33000000	33000000	33000000	11000000	11000000	1000000	1000000	1000000	1000000	58000000	62000	62000	62000	62000	58000000	62000	5800000	5800000	5800000	35000000	35000000	35000000	550000	4600000	4600000	6600000	7200000	7200000	140000	140000	1200000	1200000	140000
G3V7K3	Ceruloplasmin	4200000	4200000	3700000	3700000	3700000	950000	9700000	7300000	3700000	3700000	950000	4200000	1100000	58000000	3000000	3000000	1100000	1100000	2800000	5800000	20000000	20000000	35000000	2000000	2000000	3100000	3100000	3100000	3300000	3300000	3000000	1600000	1600000	960000	960000	1600000
A0A1S3G955	ceruloplasmin-like isoform X1	4700000	4700000	4500000	4500000	4500000	1700000	940000	11000000	4500000	4500000	1700000	4700000	660000	2400000	5300000	1400000	660000	660000	2900000	920000	920000	920000	35000000	35000000	35000000	2500000	2500000	2500000	5200000	5200000	5900000	4300000	4300000	1200000	1200000	4300000
A0A1S3GAT7	ceruloplasmin-like isoform X2	4700000	4700000	4500000	4500000	4500000	1700000	940000	11000000	4500000	4500000	1700000	4700000	1200000	5500000	5300000	1400000	1200000	1200000	2900000	4100000	4100000	4100000	810000	810000	810000	2500000	2500000	2500000	5200000	5200000	5900000	6300000	6300000	1200000	1200000	6300000
P36222	Chitinase-3-like protein 1	12000000	12000000	12000000	12000000	5000000	5000000	710000	3800000	5000000	5000000	5000000	5000000	1200000	920000	920000	920000	920000	1200000	920000	2100000	2100000	2100000	2100000	2100000	2100000	2000000	2000000	2000000	2000000	2000000	2000000	2100000	220000	220000	1800000	2100000
Q13231	Chitotriosidase-1	120000000	15000000	120000000	15000000	3500000	180000	83000000	280000	83000000	83000000	15000000	15000000	800000	3200000	560000	560000	560000	800000	560000	100000	810000	810000	2600000	2500000	35000000	2000000	10000000	2400000	2400000	2400000	97000	230000	220000	220000	27000000	230000
P51802	Chloride channel protein	33000000	33000000	33000000	33000000	33000000	33000000	11000000	180000	1000000	1000000	1000000	1000000	19000000	3200000	19000000	19000000	19000000	930000	930000	4100000	4100000	4100000	4100000	2000000	2000000	2700000	2700000	7200000	7200000	1700000	1700000	29000000	29000000	1200000	1200000	29000000
Q53FB0	Chloride intracellular channel protein	13000000	13000000	13000000	13000000	5000000	5000000	19000000	3800000	5000000	5000000	5000000	5000000	2400000	920000	920000	920000	2400000	2400000	2400000	2100000	2100000	2100000	2100000	21000000	2100000	2000000	2000000	2000000	2000000	2000000	2000000	140000	140000	220000	1800000	140000
O75390	Citrate synthase	14000000	14000000	14000000	14000000	5000000	5000000	3700000	3800000	5000000	5000000	5000000	5000000	19000000	920000	920000	920000	920000	19000000	920000	6300000	6300000	21000000	2400000	2400000	2400000	2000000	2000000	2000000	2000000	2000000	2000000	1900000	220000	220000	1800000	1900000
Q8IWP6	Class IVb beta tubulin	1700000	1700000	1700000	1700000	1700000	1700000	590000	3700000	1700000	1700000	1700000	1700000	2400000	1300000	1300000	1300000	1300000	2400000	1300000	21000000	21000000	2900000	2900000	2900000	2900000	7900000	7900000	7900000	7900000	550000	550000	500000	500000	500000	790000	500000
Q00610	Clathrin heavy chain 1	42000000	42000000	42000000	42000000	42000000	42000000	1000000	11000000	42000000	42000000	42000000	42000000	19000000	5400000	19000000	19000000	19000000	19000000	19000000	5800000	5800000	21000000	21000000	21000000	21000000	550000	41000000	7900000	550000	7200000	7200000	24000000	24000000	11000000	2700000	24000000
A0A1S3FV30	Clusterin	39000000	39000000	39000000	39000000	39000000	39000000	11000000	530000	480000	480000	480000	480000	3200000	470000	470000	1200000	1200000	3200000	1200000	1100000	1100000	1100000	2400000	2400000	2400000	1500000	1500000	1500000	1500000	7900000	7900000	120000000	120000000	500000	3300000	3300000
P10909	Clusterin	120000000	71000000	120000000	71000000	71000000	71000000	940000	1900000	71000000	120000000	120000000	120000000	5500000	10000000	5500000	5500000	5500000	58000000	5500000	21000000	21000000	13000000	13000000	810000	810000	2400000	24000000	1500000	7200000	2400000	17000000	17000000	17000000	13000000	7600000	17000000
E2DRY6	C-myc promoter-binding protein 1	440000000	7600000	440000000	7600000	7600000	7600000	81000000	5500000	7600000	440000000	440000000	440000000	430000	5500000	430000	500000	500000	430000	500000	21000000	810000	7000000	2800000	2800000	2800000	2300000	4700000	4700000	4700000	4700000	8500000	8500000	8500000	10000000	8200000	8500000
A0A024R382	CNDP dipeptidase 2	440000000	7600000	440000000	7600000	7600000	7600000	81000000	1800000	7600000	440000000	440000000	440000000	430000	5500000	430000	500000	500000	430000	500000	21000000	21000000	7000000	2800000	21000000	21000000	2300000	4700000	4700000	4700000	4700000	8500000	8500000	8500000	19000000	12000000	8500000
P00488	Coagulation factor XIII A	440000000	7600000	440000000	7600000	7600000	7600000	2200000	940000	7600000	440000000	440000000	440000000	430000	5500000	430000	500000	500000	430000	500000	4100000	810000	7000000	2800000	2400000	2400000	2300000	4700000	4700000	4700000	4700000	8500000	8500000	8500000	10000000	8200000	8500000
E9PP73	Coatomer subunit beta	14000000	14000000	14000000	14000000	14000000	14000000	1900000	820000	33000000	33000000	33000000	33000000	3200000	19000000	3200000	3200000	3200000	2200000	2200000	2100000	2100000	810000	2900000	2600000	2600000	2400000	2400000	2400000	1500000	1500000	1500000	1900000	1900000	370000	370000	1900000
P31721	Complement C1	4500000	4500000	4500000	4500000	4500000	4500000	710000	3800000	4500000	4500000	4500000	4500000	1400000	2200000	1000000	1000000	1000000	1400000	1000000	2100000	2100000	2100000	21000000	21000000	21000000	14000000	14000000	550000	550000	550000	550000	310000	310000	2200000	630000	310000
P01026	Complement C3	33000000	7000000	33000000	7000000	7000000	7000000	71000000	5500000	7000000	33000000	33000000	33000000	1400000	8400000	610000	610000	1100000	1400000	1100000	2100000	2100000	20000000	2000000	2000000	2000000	1500000	73000000	7900000	3900000	14000000	1700000	1700000	1700000	1700000	20000000	6900000
P08649	Complement C4	39000000	39000000	39000000	39000000	39000000	39000000	11000000	9900000	1000000	1000000	1000000	1000000	19000000	5500000	19000000	3200000	3200000	58000000	3200000	20000000	20000000	20000000	20000000	35000000	810000	2400000	2400000	2400000	2400000	2400000	2400000	890000	890000	6600000	6600000	890000
A0A096P6L9	Complement C5	80000000	80000000	80000000	80000000	80000000	80000000	11000000	1900000	1000000	1000000	1000000	1000000	2200000	1300000	2000000	2000000	2000000	19000000	2200000	5800000	5800000	5800000	5800000	5800000	5800000	2300000	2300000	2300000	2300000	2300000	1300000	980000	980000	1200000	1200000	980000
G5APP5	Complement component 8 subunit beta	6800000	2000000	6800000	2000000	2000000	2000000	15000000	940000	2000000	9900000	9900000	9900000	3200000	58000000	3200000	3200000	3200000	3200000	3200000	20000000	20000000	1300000	1300000	1300000	1300000	9600000	780000	550000	550000	20000000	400000	400000	400000	400000	400000	400000
E7ETH0	Complement factor I	3500000	3500000	3500000	3500000	3500000	920000	940000	940000	940000	940000	920000	3500000	3200000	58000000	2400000	2400000	2200000	3200000	1300000	2100000	2900000	2900000	20000000	21000000	20000000	510000	1500000	510000	510000	510000	850000	650000	650000	1200000	1200000	650000
Q0V8T5	Contactin-associated protein like 5	82000000	82000000	82000000	82000000	82000000	82000000	11000000	150000000	9700000	9700000	9700000	9700000	19000000	58000000	19000000	19000000	19000000	2200000	2200000	3200000	3200000	3200000	21000000	20000000	20000000	1500000	1500000	1500000	1500000	1500000	1500000	1500000	1500000	1200000	6800000	1500000
B4DIH5	COP9 signalosome complex subunit 2	14000000	14000000	14000000	14000000	14000000	920000	11000000	1900000	940000	940000	920000	920000	5500000	2800000	1400000	2200000	5500000	5500000	2200000	3200000	3200000	3200000	3200000	200000	810000	510000	1500000	510000	510000	510000	910000	980000	980000	1200000	1200000	980000
P46109	Crk-like protein	2500000	2500000	2500000	2500000	2500000	1000000	4500000	1000000	940000	940000	1000000	2500000	1100000	2200000	3500000	1900000	1200000	1100000	2900000	490000	490000	490000	4100000	4100000	4100000	760000	2400000	760000	720000	720000	700000	980000	980000	6600000	6600000	980000
Q76LA1	CSTB protein	3500000	3500000	3500000	3500000	3500000	180000	940000	1900000000	940000	940000	180000	3500000	660000	58000000	3300000	3300000	2200000	660000	660000	110000	110000	110000	110000	21000000	21000000	3900000	3900000	2800000	7900000	2800000	790000	980000	980000	5600000	5600000	980000
P01040	Cystatin-A	3500000	3500000	3500000	3500000	3500000	180000	940000	940000	1800000	1800000	180000	3500000	5500000	58000000	3300000	3300000	2400000	5500000	2200000	110000	110000	110000	110000	2700000	2700000	2400000	2400000	2400000	1500000	1500000	790000	980000	980000	6600000	6600000	980000
P32320	Cytidine deaminase	17000000	17000000	17000000	17000000	17000000	17000000	1900000	920000	33000000	33000000	33000000	33000000	2400000	2400000	2400000	2400000	2200000	2400000	2200000	810000	810000	2400000	2400000	2400000	2400000	20000000	20000000	7200000	7200000	5600000	5600000	120000000	120000000	1200000	1200000	120000000
C9JFR7	Cytochrome c	15000000	15000000	15000000	15000000	15000000	15000000	1900000	920000	33000000	33000000	33000000	33000000	19000000	2400000	19000000	19000000	19000000	660000	660000	4100000	4100000	2400000	21000000	810000	810000	7200000	7200000	1500000	550000	7200000	7200000	2100000	2100000	2100000	2100000	2100000
A0A0G2JST3	Cytokeratin-1	3700000	3700000	3700000	3700000	3700000	3700000	3000000	940000	3700000	3700000	3700000	3700000	19000000	58000000	19000000	19000000	19000000	19000000	19000000	2700000	2600000	2600000	21000000	21000000	21000000	5600000	5600000	7200000	7200000	7200000	7200000	1500000	1500000	140000	140000	1500000
Q80WH8	Cytokeratin-8	82000000	82000000	82000000	82000000	82000000	82000000	180000	250000	9700000	9700000	9700000	9700000	2200000	2200000	2200000	2200000	19000000	2400000	1100000	21000000	21000000	2100000	2100000	2900000	2900000	7200000	7200000	1500000	2400000	1500000	1500000	220000	980000	310000	8500000	8500000
G5BKX2	Cytoplasmic FMR1-interacting protein 2	550000	550000	550000	550000	550000	550000	920000	20000000	550000	550000	550000	550000	2400000	2400000	2400000	2400000	2200000	2200000	2200000	5800000	5800000	2100000	2100000	20000000	20000000	5400000	5400000	2400000	7200000	2400000	2400000	2100000	2100000	1200000	1200000	2100000
Q59F66	DEAD box polypeptide 17	820000	820000	820000	820000	820000	820000	920000	55000000	820000	820000	820000	820000	5500000	3200000	5500000	1300000	1300000	5500000	1300000	21000000	21000000	21000000	1700000	2900000	2900000	7200000	7200000	1500000	2400000	1500000	1500000	24000000	24000000	1200000	1200000	24000000
E5RFJ0	Dedicator of cytokinesis protein 2	17000000	17000000	17000000	17000000	17000000	17000000	17000000	920000	33000000	33000000	33000000	33000000	2200000	2200000	2200000	2200000	2200000	58000000	2200000	2100000	2100000	2100000	2100000	2100000	2100000	2700000	2700000	7600000	2700000	2700000	2700000	310000	310000	310000	3300000	3300000
A0N071	Delta globin	17000000	17000000	17000000	17000000	17000000	17000000	84000000	920000	33000000	33000000	33000000	33000000	2200000	2200000	2200000	2200000	1400000	2200000	2200000	5800000	2600000	2600000	2600000	2600000	2600000	7200000	7200000	13000000	7200000	41000000	41000000	140000	980000	310000	310000	140000
M0R248	Delta(3,5)-Delta(2,4)-dienoyl-CoA isomerase	17000000	17000000	17000000	17000000	17000000	17000000	150000000	920000	34000000	34000000	34000000	34000000	2200000	470000	470000	470000	470000	2200000	470000	5800000	5800000	5800000	35000000	35000000	35000000	550000	4600000	4600000	7200000	7200000	7200000	2100000	310000	310000	8500000	8500000
Q6ZMU0	Delta-aminolevulinic acid dehydratase	18000000	18000000	18000000	18000000	18000000	18000000	150000000	920000	34000000	34000000	34000000	34000000	58000000	19000000	2200000	2200000	2200000	2200000	660000	2400000	2400000	2400000	2400000	21000000	810000	1500000	1500000	1500000	1500000	1500000	1500000	5900000	310000	310000	6300000	6300000
P53634	Dipeptidyl peptidase 1	24000000	24000000	24000000	24000000	24000000	24000000	21000000	920000	39000000	39000000	39000000	39000000	3200000	5500000	3200000	19000000	19000000	3200000	19000000	2900000	2900000	2900000	810000	810000	810000	3900000	3900000	2700000	5600000	5400000	5400000	140000	220000	1900000	1900000	140000
Q9NY33	Dipeptidyl peptidase 3	17000000	17000000	17000000	17000000	17000000	17000000	940000	3700000	17000000	17000000	17000000	17000000	2200000	5500000	2200000	2200000	2200000	58000000	2200000	810000	21000000	2700000	2700000	2000000	2000000	7500000	7500000	7500000	7500000	7500000	7500000	310000	830000	6600000	35000000	310000
F8VRV5	Dynein light chain 1	24000000	24000000	24000000	24000000	24000000	24000000	14000000	920000	39000000	39000000	39000000	39000000	19000000	58000000	19000000	19000000	58000000	1300000	1300000	3200000	3200000	3200000	3200000	3200000	3200000	550000	1500000	7900000	550000	550000	550000	5900000	5900000	440000	5800000	5800000
Q8NG06	E3 ubiquitin-protein ligase TRIM58	24000000	24000000	24000000	24000000	24000000	24000000	530000	920000	42000000	42000000	42000000	42000000	1200000	2200000	1000000	3200000	2200000	1200000	2200000	810000	810000	21000000	1600000	1600000	1600000	41000000	41000000	14000000	14000000	2800000	2800000	890000	1900000	1900000	1900000	890000
O88752	Epsilon 1 globin	11000000	11000000	11000000	11000000	11000000	11000000	2100000	2100000	2100000	2100000	2100000	2100000	1400000	2200000	1000000	4300000	2200000	1400000	2200000	82000	82000	82000	810000	810000	200000	1500000	5600000	1500000	1500000	1500000	1500000	1500000	1500000	1200000	1200000	1500000
Q14240	Eukaryotic initiation factor 4A-II	24000000	24000000	24000000	24000000	24000000	24000000	550000	920000	42000000	42000000	42000000	42000000	1400000	1100000	1100000	19000000	19000000	1400000	19000000	2700000	2700000	2700000	35000000	21000000	21000000	1500000	1500000	3900000	1500000	3900000	3900000	2100000	2100000	1900000	1900000	2100000
A9X7H1	Eukaryotic translation elongation factor 1 alpha	25000000	25000000	25000000	25000000	25000000	25000000	550000	920000	74000000	74000000	74000000	74000000	2200000	4300000	2200000	1200000	1200000	2200000	1200000	4100000	21000000	21000000	20000000	21000000	21000000	7200000	7200000	1500000	2400000	1500000	1500000	310000	220000	1900000	1900000	310000
Q2F838	Eukaryotic translation elongation factor 1 gamma	18000000	18000000	18000000	18000000	18000000	18000000	3800000	17000000	18000000	18000000	18000000	18000000	1200000	19000000	1200000	1200000	1200000	1200000	1200000	3200000	3200000	3800000	21000000	2100000	21000000	24000000	24000000	24000000	24000000	24000000	24000000	140000	830000	870000	5600000	140000
Q24JU4	Eukaryotic translation initiation factor 3 subunit A	30000000	30000000	30000000	30000000	30000000	30000000	550000	920000	80000000	80000000	80000000	80000000	2200000	2400000	2200000	3200000	3200000	2200000	3200000	4100000	21000000	21000000	21000000	21000000	21000000	7200000	5400000	1200000	1200000	2800000	2800000	29000000	29000000	1200000	960000	29000000
Q86WD0	Eukaryotic translation initiation factor 4A isoform 2-like protein	33000000	1500000	33000000	1500000	2600000	2600000	20000000	12000000	2600000	33000000	1500000	1500000	19000000	630000	630000	630000	630000	19000000	630000	2100000	2100000	21000000	10000000	10000000	10000000	6600000	4000000	2400000	2400000	2400000	2400000	2100000	270000	270000	3600000	1700000
C9J7B5	Eukaryotic translation initiation factor 5A	480000	480000	480000	480000	480000	480000	11000000	530000	1900000000	1900000000	480000	480000	2200000	58000000	2200000	5500000	2400000	2200000	2400000	2900000	2900000	2900000	2900000	2900000	2900000	7200000	7200000	2800000	7200000	7200000	7200000	140000	270000	270000	270000	140000
P49327	Fatty acid synthase	480000	480000	480000	480000	480000	480000	11000000	9900000	180000	180000	480000	480000	2200000	3200000	2200000	5500000	2200000	2200000	2200000	5800000	5800000	2500000	2500000	2500000	20000000	2400000	1500000	1500000	1500000	1500000	1500000	310000	270000	270000	5800000	5800000
Q6S4P3	Ferritin	21000000	14000000	21000000	14000000	4900000	4900000	920000	13000000	21000000	21000000	14000000	14000000	3200000	8700000	420000	420000	2400000	2400000	930000	21000000	21000000	21000000	870000	810000	810000	1700000	2200000	1700000	1700000	1700000	1700000	5900000	5900000	1200000	3700000	1800000
G5BT88	Fetuin-B	3600000	350000	3600000	350000	350000	350000	350000	12000000	350000	3600000	3600000	3600000	1400000	58000000	1400000	1400000	5500000	1400000	5500000	2100000	2900000	2900000	2900000	2900000	2900000	7200000	7200000	14000000	7200000	7600000	7600000	500000	500000	1200000	1200000	500000
Q7TQ70	Fibrinogen alpha chain	12000000	12000000	12000000	12000000	5000000	5000000	19000000	3800000	5000000	5000000	5000000	5000000	2400000	920000	920000	920000	920000	2400000	920000	2100000	810000	810000	810000	810000	810000	2000000	2000000	2000000	2000000	2000000	2000000	5900000	5900000	220000	1800000	5900000
P14480	Fibrinogen beta chain	140000000	140000000	140000000	140000000	140000000	140000000	1000000	11000000	140000000	140000000	140000000	140000000	1200000	1700000	62000	62000	62000	1200000	62000	5800000	2000000	3100000	3100000	3100000	3100000	12000000	12000000	12000000	12000000	12000000	12000000	2100000	2100000	1200000	1200000	2100000
P02680	Fibrinogen gamma chain	14000000	14000000	14000000	14000000	14000000	14000000	1900000	820000	33000000	33000000	33000000	33000000	1200000	2200000	930000	930000	1200000	1200000	1200000	7000000	7000000	2400000	2400000	2400000	2400000	550000	2400000	20000000	5600000	3900000	3900000	310000	2300000	2300000	2300000	310000
F1LST1	Fibronectin	3500000	3500000	3500000	3500000	3500000	180000	940000	180000	940000	940000	180000	3500000	1200000	5500000	3300000	3300000	2200000	1200000	1200000	110000	110000	2600000	2600000	2400000	2400000	3900000	3900000	5600000	5600000	3900000	790000	980000	980000	5600000	5600000	980000
P09467	Fructose-1,6-bisphosphatase 1	1600000	2200000	1600000	2200000	610000	610000	560000	920000	1600000	1600000	2200000	2200000	3200000	58000000	3200000	3200000	1100000	1100000	1100000	4100000	4100000	4100000	810000	1700000	1700000	5400000	1200000	7200000	2700000	6600000	6600000	1500000	1500000	1200000	900000	420000
H3BU78	Fructose-bisphosphate aldolase	1600000	2200000	1600000	2200000	610000	610000	560000	920000	1600000	1600000	2200000	2200000	19000000	19000000	19000000	19000000	1400000	1400000	1400000	2100000	2000000	2000000	810000	810000	810000	3900000	1200000	1700000	14000000	6600000	6600000	24000000	24000000	960000	900000	420000
P04075	Fructose-bisphosphate aldolase A	30000000	30000000	30000000	30000000	30000000	30000000	690000	920000	84000000	84000000	84000000	84000000	58000000	1300000	1300000	2200000	2200000	58000000	19000000	21000000	810000	810000	810000	810000	810000	9600000	9600000	550000	9600000	20000000	20000000	140000	5900000	5900000	2700000	140000
J3KSV6	Fructose-bisphosphate aldolase C	1900000000	130000000	1900000000	130000000	130000000	130000000	130000000	1600000	130000000	1900000000	4200000	1400000	8000000	58000000	10000000	930000	930000	3000000	4000000	2700000	4800000	45000000	15000000	2100000	2100000	72000000	220000000	7600000	2700000	2700000	92000000	92000000	92000000	120000000	120000000	92000000
F5H0C8	Gamma-enolase	11000000	11000000	11000000	11000000	11000000	11000000	940000	180000	11000000	11000000	11000000	11000000	19000000	1400000	19000000	19000000	19000000	19000000	19000000	5800000	5800000	5800000	5800000	5800000	5800000	7200000	550000	7900000	20000000	20000000	20000000	830000	630000	630000	990000	830000
Q14403	Gamma-G globin	33000000	33000000	33000000	33000000	33000000	33000000	820000	920000	96000000	96000000	96000000	96000000	58000000	3200000	58000000	58000000	58000000	58000000	3200000	21000000	21000000	2100000	2100000	2400000	2400000	1500000	1500000	3900000	3900000	3900000	3900000	140000	1500000	1500000	1500000	140000
P47819	Glial fibrillary acidic protein	18000000	18000000	18000000	18000000	18000000	18000000	250000	920000	34000000	34000000	34000000	34000000	58000000	58000000	660000	660000	2200000	660000	660000	5800000	5800000	21000000	21000000	21000000	1700000	7200000	7200000	7200000	7200000	7200000	7200000	1900000	310000	310000	17000000	17000000
A0A1K0FUA6	Globin a2	18000000	18000000	18000000	18000000	18000000	18000000	2100000	2100000	2100000	2100000	2100000	2100000	1400000	58000000	1400000	4300000	4300000	1400000	4300000	82000	21000000	21000000	21000000	21000000	200000	1500000	41000000	1500000	1500000	1500000	1500000	13000000	13000000	1200000	1200000	13000000
A0A0G2JSW3	Globin a4	19000000	19000000	19000000	19000000	19000000	19000000	2100000	2100000	2100000	2100000	2100000	2100000	5500000	2200000	5500000	4300000	4300000	5500000	4300000	82000	21000000	21000000	21000000	810000	200000	1500000	1200000	1500000	1500000	1500000	1500000	310000	310000	1200000	1200000	310000
A0A0G2JSV6	Globin c2	19000000	19000000	19000000	19000000	19000000	2200000	4200000	2200000	4200000	4200000	4200000	4200000	5500000	19000000	5500000	2800000	2800000	5500000	2800000	5800000	1300000	2700000	2700000	2700000	4100000	1500000	1500000	1500000	1500000	1500000	1500000	2100000	2100000	1200000	1200000	2100000
B1H216	Globin c3	20000000	20000000	20000000	20000000	20000000	2200000	1900000000	2200000	1900000000	1900000000	1900000000	1900000000	660000	58000000	660000	2800000	2800000	660000	2800000	5800000	1300000	2400000	2400000	21000000	21000000	2400000	2400000	1500000	1500000	1500000	1500000	140000	140000	990000	990000	140000
B4DVJ0	Glucose-6-phosphate isomerase	33000000	33000000	33000000	33000000	33000000	33000000	920000	920000	96000000	96000000	96000000	96000000	19000000	2200000	19000000	19000000	2400000	19000000	19000000	21000000	1700000	1700000	1700000	1700000	1700000	13000000	13000000	5400000	13000000	13000000	13000000	2100000	2100000	2100000	2100000	2100000
A0A024R592	Glucosidase	33000000	33000000	33000000	33000000	33000000	33000000	920000	920000	96000000	96000000	96000000	96000000	19000000	2400000	19000000	19000000	19000000	470000	2400000	20000000	21000000	21000000	21000000	21000000	21000000	7900000	6600000	550000	5400000	7900000	7900000	5900000	5900000	1500000	1500000	5900000
K7ELL7	Glucosidase 2 subunit beta	1500000	1500000	1500000	1500000	1500000	1500000	510000	19000000	1500000	1500000	1500000	1500000	58000000	5500000	58000000	58000000	58000000	58000000	58000000	4100000	4100000	4100000	4100000	20000000	20000000	1500000	1500000	7900000	7900000	7900000	7900000	2100000	2100000	1200000	1200000	2100000
A0A158QXH4	Glucuronosyltransferase	21000000	21000000	21000000	21000000	21000000	21000000	250000	920000	39000000	39000000	39000000	39000000	19000000	58000000	19000000	19000000	660000	2200000	2200000	2900000	2900000	2900000	20000000	20000000	2400000	5600000	5600000	5600000	5600000	5600000	5600000	2100000	2100000	1200000	1200000	2100000
Q59FQ4	Glutamate dehydrogenase 1	33000000	33000000	33000000	33000000	33000000	33000000	920000	920000	96000000	96000000	96000000	96000000	3200000	3200000	3200000	3200000	19000000	3200000	2200000	3200000	3200000	2700000	2700000	2700000	2700000	2700000	2700000	7600000	7900000	1700000	1700000	92000000	92000000	2100000	2100000	92000000
P49448	Glutamate dehydrogenase 2	11000000	11000000	11000000	11000000	11000000	11000000	940000	940000	11000000	11000000	11000000	11000000	2400000	660000	660000	660000	660000	2400000	660000	21000000	810000	810000	810000	35000000	35000000	5600000	5600000	7200000	1700000	7200000	7200000	140000	630000	630000	990000	140000
A0A024RAM2	Glutaredoxin	33000000	33000000	33000000	33000000	33000000	33000000	920000	920000	120000000	120000000	120000000	120000000	19000000	2400000	19000000	19000000	19000000	4300000	2200000	2400000	21000000	3200000	3200000	3200000	3200000	3900000	3900000	3900000	3900000	550000	550000	830000	830000	1500000	1500000	830000
Q7L4Q3	Glutathione peroxidase	33000000	33000000	33000000	33000000	33000000	33000000	920000	920000	140000000	140000000	140000000	140000000	1200000	2200000	930000	930000	3200000	1200000	3200000	3200000	3200000	3200000	20000000	3200000	3200000	5400000	5400000	1500000	7200000	2400000	2400000	630000	1500000	1500000	1500000	630000
E5RI06	Glutathione reductase	33000000	33000000	33000000	33000000	33000000	33000000	920000	84000000	150000000	150000000	150000000	150000000	3200000	3200000	3200000	1400000	19000000	3200000	19000000	35000000	35000000	35000000	35000000	35000000	35000000	41000000	41000000	7200000	6600000	2400000	2400000	2100000	1500000	1500000	1500000	2100000
A8MX94	Glutathione S-transferase P	33000000	33000000	33000000	33000000	33000000	33000000	920000	96000000	210000000	210000000	210000000	210000000	2400000	5500000	2400000	2400000	3200000	2400000	3200000	3200000	3200000	3200000	3200000	3200000	3200000	2800000	2800000	3900000	2800000	2800000	2800000	1500000	2100000	2100000	2100000	1500000
B7Z514	Glutathione synthetase	33000000	33000000	33000000	33000000	33000000	33000000	920000	96000000	150000000	150000000	150000000	150000000	19000000	3200000	19000000	19000000	1200000	19000000	1200000	2400000	810000	1600000	1600000	1600000	1600000	13000000	13000000	5400000	20000000	20000000	20000000	2100000	2100000	2100000	2100000	2100000
Q2TSD0	Glyceraldehyde-3-phosphate dehydrogenase	33000000	33000000	33000000	33000000	33000000	33000000	920000	96000000	210000000	210000000	210000000	210000000	2200000	58000000	2200000	2200000	19000000	2200000	19000000	21000000	21000000	21000000	35000000	21000000	21000000	5600000	5600000	7200000	1700000	7200000	7200000	140000	980000	1500000	1500000	140000
P41250	Glycine-tRNA ligase	33000000	33000000	33000000	33000000	33000000	33000000	920000	96000000	310000000	310000000	310000000	310000000	1400000	4300000	1400000	1400000	2200000	1400000	2200000	21000000	2100000	2500000	2600000	2600000	2600000	1500000	1500000	3900000	3900000	3900000	3900000	2100000	1500000	1500000	1500000	2100000
P11217	Glycogen phosphorylase	33000000	33000000	33000000	33000000	33000000	33000000	920000	96000000	260000000	260000000	260000000	260000000	2200000	2400000	2200000	660000	2400000	2200000	2400000	4100000	4100000	4100000	21000000	21000000	21000000	2800000	2800000	3900000	9600000	13000000	13000000	2100000	1500000	1500000	1500000	2100000
A0A090N8G0	Glycyl-tRNA synthetase	1700000	1700000	1700000	1700000	1700000	1700000	3700000	3800000	430000	430000	430000	1700000	2400000	58000000	3200000	2600000	1400000	2400000	5800000	2000000	2000000	2500000	2500000	21000000	35000000	1400000	4600000	1400000	1400000	1400000	1400000	1500000	1500000	1200000	1200000	1500000
Q9JL97	GPI-anchored ceruloplasmin	4200000	4200000	3700000	3700000	3700000	950000	1000000	11000000	3700000	3700000	950000	4200000	5500000	58000000	3000000	3000000	5500000	5500000	2800000	5800000	5800000	5800000	810000	810000	810000	3100000	3100000	3100000	3300000	3300000	3000000	1600000	1600000	2200000	2200000	1600000
B0LPF3	Growth factor receptor-bound protein 2	1200000	1200000	1200000	1200000	1200000	1200000	710000	3800000	430000	430000	430000	1200000	19000000	5500000	1400000	1400000	1400000	19000000	1400000	2100000	35000000	35000000	35000000	35000000	20000000	910000	7200000	910000	910000	910000	910000	1900000	1900000	990000	5600000	5600000
P06866	Haptoglobin	18000000	18000000	18000000	18000000	18000000	18000000	3800000	940000	18000000	18000000	18000000	18000000	1200000	19000000	1200000	1200000	1200000	1200000	1200000	3200000	3200000	3800000	3800000	35000000	35000000	24000000	24000000	24000000	24000000	24000000	24000000	630000	870000	870000	5600000	630000
A0A024R3X7	Heat shock 10kDa protein 1	1700000	1700000	1700000	1700000	1700000	1700000	3700000	3800000	510000	510000	510000	1700000	2200000	2400000	3200000	2600000	5500000	2200000	5800000	2000000	2000000	2000000	20000000	20000000	20000000	1400000	4600000	1400000	1400000	1400000	1400000	140000	140000	6600000	6600000	140000
V9GZ37	Heat shock 70 kDa	1300000	1300000	1300000	1300000	1300000	430000	19000000	3800000	940000	940000	430000	1300000	19000000	2200000	970000	970000	1100000	19000000	660000	240000	240000	240000	240000	2100000	21000000	1200000	1700000	1200000	340000	340000	1700000	650000	650000	1200000	1200000	650000
A8K7Q2	Heat shock cognate 71 kDa	2000000	2000000	2000000	2000000	2000000	1400000	3700000	9700000	870000000	870000000	1400000	2000000	2200000	2200000	1500000	1500000	5500000	2200000	1300000	240000	240000	240000	21000000	21000000	21000000	5400000	5400000	5400000	530000	530000	5400000	4300000	4300000	1200000	1200000	4300000
Q9UQC1	Heat shock protein 72 kDa	5600000	5600000	1900000	1900000	1900000	1900000	1900000000	11000000	1900000	1900000	1900000	5600000	3200000	930000	930000	5500000	3200000	3200000	3000000	4100000	2000000	810000	810000	21000000	21000000	2400000	2400000	2400000	1500000	1500000	1500000	140000	140000	1200000	1200000	140000
Q58FF9	Heat shock protein 90Af	34000000	34000000	34000000	34000000	34000000	34000000	920000	210000000	440000000	440000000	440000000	440000000	58000000	2400000	420000	420000	420000	58000000	420000	410000	410000	410000	20000000	20000000	20000000	1700000	1700000	7200000	7200000	7200000	480000	480000	480000	440000	440000	480000
Q58FF2	Heat shock protein 94c	34000000	34000000	34000000	34000000	34000000	34000000	920000	260000000	440000000	440000000	440000000	440000000	1400000	2200000	420000	420000	420000	1400000	58000000	410000	410000	810000	5800000	5800000	5800000	7200000	7200000	1500000	1500000	1500000	480000	400000	400000	440000	440000	400000
F8WE04	Heat shock protein beta-1	34000000	34000000	34000000	34000000	34000000	34000000	920000	310000000	440000000	440000000	440000000	440000000	2200000	3200000	420000	420000	420000	2200000	2200000	410000	410000	410000	410000	2500000	2000000	550000	2400000	550000	550000	550000	480000	2100000	2100000	960000	8500000	8500000
G3V2J8	Heat shock protein HSP 90-alpha	39000000	39000000	39000000	39000000	39000000	39000000	920000	440000000	440000000	440000000	440000000	440000000	2200000	3200000	420000	420000	420000	2200000	420000	410000	410000	410000	410000	2600000	2600000	1500000	1500000	1500000	1500000	1500000	480000	400000	400000	400000	5600000	5600000
P20059	Hemopexin	30000000	30000000	30000000	30000000	30000000	30000000	550000	920000	82000000	82000000	82000000	82000000	2200000	2200000	2200000	19000000	19000000	2200000	19000000	4100000	1700000	2500000	2500000	2500000	2500000	1200000	2400000	20000000	7900000	3900000	3900000	310000	310000	1200000	1200000	310000
A0A0G2K8K3	Heparin cofactor 2	1600000	2200000	1600000	2200000	610000	610000	690000	920000	1600000	1600000	2200000	2200000	2400000	5500000	2400000	2400000	1400000	1400000	1400000	35000000	20000000	2400000	810000	21000000	21000000	1200000	1200000	14000000	14000000	14000000	14000000	1900000	1900000	1200000	900000	420000
F8VZ49	Heterogeneous nuclear ribonucleoprotein A1	14000000	14000000	14000000	14000000	14000000	14000000	940000	940000	14000000	14000000	14000000	14000000	58000000	5500000	58000000	58000000	58000000	58000000	58000000	810000	810000	21000000	21000000	2400000	2400000	7200000	7200000	7900000	7900000	3900000	3900000	140000	1600000	1600000	1600000	140000
A0A024RA28	Heterogeneous nuclear ribonucleoprotein A2/B1	39000000	39000000	39000000	39000000	39000000	39000000	920000	440000000	440000000	440000000	440000000	440000000	660000	58000000	660000	660000	58000000	660000	58000000	2400000	2400000	2400000	2400000	2400000	810000	2400000	2400000	2400000	2400000	2400000	2400000	230000	230000	230000	230000	230000
P51991	Heterogeneous nuclear ribonucleoprotein A3	96000000	96000000	96000000	96000000	96000000	96000000	440000000	96000000	440000000	440000000	440000000	440000000	2200000	58000000	2200000	2200000	2200000	2200000	2200000	920000	7000000	7000000	810000	21000000	21000000	1500000	1500000	7900000	3900000	7900000	7900000	1900000	1900000	1200000	1200000	1900000
O60812	Heterogeneous nuclear ribonucleoprotein C-like 1	96000000	96000000	96000000	96000000	96000000	590000	11000000	1600000	940000	940000	590000	590000	58000000	4300000	58000000	1200000	2200000	58000000	2200000	21000000	21000000	21000000	21000000	21000000	21000000	20000000	1200000	1200000	41000000	41000000	41000000	140000	29000000	400000	5600000	5600000
A0A024RDB4	Heterogeneous nuclear ribonucleoprotein D	6200000	880000	6200000	880000	880000	880000	880000	55000000	880000	6200000	6200000	6200000	2200000	5500000	2200000	3200000	58000000	2400000	1100000	810000	810000	810000	35000000	20000000	20000000	20000000	20000000	2800000	2800000	2800000	2800000	24000000	310000	370000	520000	24000000
D6RAF8	Heterogeneous nuclear ribonucleoprotein D0	6200000	880000	6200000	880000	880000	880000	880000	60000000	880000	6200000	6200000	6200000	2200000	5500000	2200000	19000000	19000000	2400000	1200000	5800000	810000	2400000	21000000	2600000	2600000	1500000	1500000	1500000	1500000	1500000	1500000	310000	310000	960000	520000	310000
P19367	Hexokinase-1	3000000	3000000	3000000	3000000	3000000	3000000	940000	1900000	3000000	3000000	3000000	3000000	2200000	2200000	1300000	5500000	2400000	2200000	2200000	4100000	4100000	21000000	21000000	21000000	21000000	1700000	1700000	2700000	1700000	6600000	6600000	140000	140000	370000	6900000	6900000
P52789	Hexokinase-2	100000000	100000000	100000000	100000000	100000000	100000000	440000000	150000000	870000000	870000000	870000000	870000000	58000000	2200000	58000000	58000000	58000000	58000000	58000000	3200000	21000000	21000000	21000000	21000000	21000000	7600000	7600000	7600000	7600000	2700000	2700000	140000	29000000	440000	440000	140000
A0A1S3FYV0	histone deacetylase 10 isoform X1	96000000	4300000	96000000	4300000	4300000	20000000	590000	19000000	20000000	96000000	96000000	96000000	2400000	3200000	2400000	2400000	19000000	1200000	1200000	2100000	2100000	1000000	1000000	1000000	1700000	7200000	4400000	7200000	7200000	7200000	7200000	140000	1700000	2100000	860000	140000
A0A1S3FXW3	histone deacetylase 10 isoform X2	96000000	4300000	96000000	4300000	4300000	20000000	870000000	3700000	20000000	96000000	96000000	96000000	2400000	58000000	2400000	2400000	2400000	3200000	1400000	21000000	21000000	1000000	1000000	21000000	21000000	6600000	4400000	1500000	7200000	1500000	1500000	310000	5900000	2100000	860000	310000
A0A1S3FXC8	histone deacetylase 10 isoform X3	96000000	4300000	96000000	4300000	4300000	20000000	590000	3700000	20000000	96000000	96000000	96000000	2200000	2200000	1100000	1100000	2400000	19000000	2200000	2900000	810000	1000000	1000000	1000000	2400000	7900000	4400000	7900000	7900000	7900000	7900000	2100000	2100000	2100000	860000	2100000
A0A1S3FXC9	histone deacetylase 10 isoform X4	96000000	4300000	96000000	4300000	4300000	20000000	940000	3700000	20000000	96000000	96000000	96000000	2200000	2200000	1100000	1100000	2200000	19000000	2200000	5800000	21000000	1000000	1000000	1000000	1000000	3900000	4400000	7200000	7200000	20000000	20000000	310000	310000	2100000	860000	310000
A0A1S3FYV5	histone deacetylase 10 isoform X5	96000000	4300000	96000000	4300000	4300000	20000000	870000000	3700000	20000000	96000000	96000000	96000000	2200000	2200000	1100000	1100000	2200000	2400000	660000	21000000	35000000	1000000	1000000	20000000	20000000	1500000	4400000	3900000	1500000	3900000	3900000	310000	310000	2100000	860000	310000
A0A0K0CZ30	HMG box domain-containing protein	30000000	30000000	30000000	30000000	30000000	30000000	560000	920000	82000000	82000000	82000000	82000000	660000	710000	710000	2400000	2400000	660000	19000000	3200000	3200000	5800000	5800000	5800000	5800000	41000000	940000	5600000	7600000	7600000	7600000	2100000	2100000	1200000	1200000	2100000
A0A0G2JUG1	IF rod domain-containing protein	11000000	940000	11000000	940000	940000	530000	11000000	150000000	11000000	11000000	940000	940000	19000000	1000000	5500000	700000	1200000	19000000	2100000	5800000	5800000	5800000	35000000	35000000	35000000	4400000	4400000	4400000	4400000	4400000	1500000	980000	980000	980000	1200000	980000
P20761	Ig gamma-2B chain C region	310000000	11000000	310000000	11000000	11000000	11000000	2200000	940000	11000000	310000000	310000	570000	1400000	3500000	3500000	3500000	1400000	1400000	1400000	7000000	7000000	12000000	2100000	2100000	2100000	8100000	2500000	2500000	660000	660000	5600000	2700000	5600000	9700000	8400000	6300000
A0A091D626	Ig heavy chain V-III region VH26	17000000	760000	17000000	760000	3100000	3100000	11000000	4700000	17000000	17000000	760000	760000	1400000	5500000	750000	19000000	1100000	1400000	1400000	2100000	2100000	2100000	2500000	20000000	20000000	7200000	1200000	1500000	2400000	1500000	1500000	1900000	1900000	440000	6600000	1900000
A0A091E338	Ig kappa chain V-III region MOPC	30000000	30000000	30000000	30000000	30000000	30000000	560000	920000	83000000	83000000	83000000	83000000	58000000	2200000	58000000	2200000	2200000	58000000	3200000	2700000	2700000	2700000	35000000	35000000	35000000	2700000	2700000	2400000	7200000	2400000	2400000	830000	220000	1200000	5000000	830000
A0A091DTN7	Ig kappa chain V-III region VG	30000000	30000000	30000000	30000000	30000000	30000000	820000	920000	96000000	96000000	96000000	96000000	2200000	2200000	2200000	2200000	2200000	2200000	1200000	41000	35000000	2100000	2100000	200000	200000	1500000	1500000	1500000	2400000	1500000	1500000	11000000	11000000	5900000	2700000	11000000
F1M1R0	Ig kappa chain V-IV region-like	1000000	1000000	1000000	1000000	1000000	1000000	430000	19000000	1000000	1000000	1000000	1000000	2200000	2200000	2200000	2200000	2200000	2400000	5500000	21000000	21000000	21000000	4100000	21000000	21000000	6600000	2400000	7200000	7200000	7200000	7200000	310000	29000000	440000	1700000	310000
M0RDL2	Ig-like domain-containing protein	33000000	33000000	33000000	33000000	33000000	33000000	920000	120000000	440000000	440000000	440000000	440000000	2200000	5500000	2200000	58000000	2200000	2200000	1400000	2900000	2900000	2900000	2900000	2900000	2900000	20000000	7900000	5600000	3900000	3900000	3900000	2100000	2100000	1500000	1500000	2100000
H0Y8C6	Importin-5	120000000	120000000	120000000	120000000	120000000	120000000	440000000	440000000	870000000	870000000	870000000	870000000	2200000	930000	930000	930000	930000	2200000	930000	21000000	21000000	21000000	35000000	21000000	21000000	3900000	3900000	6600000	2800000	6600000	6600000	310000	310000	1200000	1200000	310000
O95373	Importin-7 OS=Homo sapiens GN=IPO7 PE=1 SV=1	120000000	120000000	120000000	120000000	120000000	890000	11000000	1900000	940000	940000	890000	890000	5500000	58000000	5500000	2400000	1400000	5500000	2800000	4200000	4200000	1600000	2000000	810000	810000	6000000	6000000	6000000	1600000	1600000	1700000	980000	980000	1200000	1200000	980000
E5RG13	Inositol monophosphatase 1	2100000	2100000	2100000	2100000	2100000	2100000	870000000	3700000	2100000	2100000	2100000	2100000	2200000	2400000	2200000	2200000	2200000	2200000	2200000	2100000	2100000	21000000	21000000	4100000	4100000	14000000	14000000	7200000	1700000	7200000	7200000	2100000	2100000	1200000	1200000	2100000
A0A024R830	Inositol(Myo)-1(Or 4)-monophosphatase 1	2100000	2100000	2100000	2100000	2100000	2100000	590000	3700000	2100000	2100000	2100000	2100000	2200000	2200000	1300000	2200000	58000000	2200000	2400000	35000000	35000000	2700000	21000000	810000	35000000	7900000	7900000	3900000	1500000	3900000	3900000	5900000	5900000	1200000	1200000	5900000
Q8TAY0	Insulin-like growth factor binding protein	2100000	2100000	2100000	2100000	2100000	2100000	940000	3700000	2100000	2100000	2100000	2100000	2200000	58000000	2200000	2200000	58000000	2200000	58000000	5800000	1700000	1700000	20000000	810000	810000	7200000	7200000	1500000	7200000	2400000	2400000	830000	890000	890000	890000	830000
P23229	Integrin alpha-6	2100000	2100000	2100000	2100000	2100000	2100000	870000000	4500000	2100000	2100000	2100000	2100000	2200000	58000000	2200000	2200000	2200000	2200000	2200000	2400000	2400000	2400000	4100000	4100000	4100000	7200000	7200000	1500000	1500000	1500000	1500000	2100000	2100000	1200000	1200000	2100000
K7EP83	Integrin alpha-IIb	1000000	1000000	1000000	1000000	1000000	1000000	530000	920000	250000	250000	1000000	1000000	2200000	2400000	1100000	1100000	2200000	58000000	370000	4100000	4100000	21000000	810000	810000	810000	1100000	4600000	1100000	1100000	1100000	850000	980000	980000	980000	980000	980000
P11215	Integrin alpha-M	1000000	1000000	1000000	1000000	1000000	1000000	550000	920000	250000	250000	1000000	1000000	2200000	2200000	1100000	1100000	2200000	1100000	370000	4100000	4100000	4100000	35000000	20000000	20000000	1100000	4600000	1100000	1100000	1100000	850000	980000	980000	980000	980000	980000
P05556	Integrin beta-1	920000	920000	920000	920000	920000	920000	940000	710000	920000	920000	920000	920000	2200000	2200000	1300000	1300000	58000000	2200000	2200000	4100000	4100000	4100000	20000000	810000	4100000	1500000	1500000	1500000	1500000	1500000	1500000	140000	140000	5600000	5600000	140000
P05107	Integrin beta-2	140000000	140000000	140000000	140000000	140000000	140000000	440000000	440000000	440000000	440000000	440000000	440000000	1200000	2200000	920000	920000	920000	1200000	920000	2100000	2100000	2100000	21000000	21000000	21000000	3900000	3900000	3900000	3900000	3900000	3900000	1500000	890000	890000	3300000	3300000
I3L4X8	Integrin beta-3	260000000	260000000	260000000	260000000	260000000	260000000	440000000	440000000	440000000	440000000	440000000	440000000	19000000	2200000	19000000	19000000	19000000	19000000	1400000	5800000	2000000	2000000	35000000	35000000	35000000	1700000	1700000	1700000	14000000	6600000	290000	290000	290000	2100000	290000	290000
Q0MVN7	Integrin subunit aIIb	260000000	260000000	260000000	260000000	260000000	260000000	440000000	440000000	440000000	440000000	440000000	440000000	2400000	19000000	2400000	2400000	2400000	2400000	1400000	5800000	5800000	5800000	35000000	35000000	21000000	3900000	2800000	2800000	2800000	2800000	290000	290000	290000	2100000	290000	290000
A0A087WWY6	Integrin-linked protein kinase	210000000	210000000	210000000	210000000	210000000	210000000	440000000	440000000	440000000	440000000	440000000	440000000	2200000	2200000	2200000	2200000	2200000	2200000	2200000	5800000	21000000	21000000	21000000	2400000	2400000	1500000	1400000	1400000	1400000	1400000	1400000	92000000	92000000	890000	4300000	4300000
Q5EBC0	Inter alpha-trypsin inhibitor	33000000	33000000	33000000	33000000	33000000	33000000	920000	150000000	440000000	440000000	440000000	440000000	2200000	19000000	420000	420000	420000	2200000	420000	410000	2000000	2000000	4100000	4100000	1700000	7200000	7200000	7200000	7200000	7200000	480000	2100000	2100000	6600000	6600000	2100000
O35802	Inter-alpha-inhibitor H4 heavy chain	33000000	33000000	33000000	33000000	33000000	33000000	920000	150000000	440000000	440000000	440000000	440000000	660000	2400000	420000	420000	420000	660000	2200000	410000	1700000	2100000	5800000	5800000	5800000	550000	4600000	2400000	2400000	2400000	480000	480000	480000	440000	440000	480000
D3ZFH5	Inter-alpha-trypsin inhibitor heavy chain 2	34000000	34000000	34000000	34000000	34000000	430000	11000000	250000	940000	940000	430000	430000	2400000	58000000	870000	1400000	19000000	58000000	19000000	240000	240000	21000000	21000000	21000000	21000000	7900000	7900000	7900000	340000	14000000	3000000	1800000	1800000	440000	440000	1800000
D3ZFC6	Inter-alpha-trypsin inhibitor heavy chain 4	34000000	34000000	34000000	34000000	34000000	34000000	920000	210000000	440000000	440000000	440000000	440000000	58000000	19000000	2200000	2200000	2200000	2200000	660000	410000	410000	1600000	1600000	1600000	1600000	2800000	2800000	9600000	9600000	1200000	480000	2100000	2100000	960000	12000000	12000000
G5BUN2	Inter-alpha-trypsin inhibitor heavy chain H1	1700000	1700000	1700000	1700000	1700000	1700000	3700000	480000	590000	590000	590000	1700000	2200000	2200000	3200000	2600000	5500000	2200000	5800000	2000000	2000000	2000000	2000000	2000000	2000000	1400000	4600000	1400000	1400000	1400000	1400000	2100000	140000	400000	300000	300000
G5AXV8	Inter-alpha-trypsin inhibitor heavy chain H2	2800000	2800000	2800000	2800000	2800000	1400000	4500000	1000000	870000000	870000000	1400000	2800000	1400000	2200000	1700000	1700000	3200000	1400000	1900000	240000	2000000	2600000	2600000	2600000	810000	9600000	9600000	9600000	530000	530000	7900000	8700000	8700000	6600000	6600000	8700000
Q63416	Inter-alpha-trypsin inhibitor heavy chain H3	5600000	5600000	1900000	1900000	1900000	1900000	180000	11000000	1900000	1900000	1900000	5600000	19000000	3200000	19000000	5500000	19000000	19000000	3000000	4100000	4100000	4100000	4100000	4100000	35000000	1500000	1500000	1500000	1500000	1500000	1500000	140000	140000	140000	140000	140000
A0A091D4Q8	Inter-alpha-trypsin inhibitor heavy chain H4	34000000	34000000	34000000	34000000	34000000	34000000	920000	440000000	440000000	440000000	440000000	440000000	2200000	3200000	420000	420000	1400000	2200000	1400000	410000	410000	410000	410000	410000	410000	550000	6700000	1200000	14000000	7900000	480000	2100000	2100000	6600000	6600000	2100000
A9Q1P5	Interphotoreceptor retinoid binding protein	14000000	14000000	14000000	14000000	14000000	14000000	940000	940000	14000000	14000000	14000000	14000000	1200000	2200000	930000	930000	930000	1200000	930000	20000000	20000000	2700000	810000	21000000	810000	2400000	2400000	2400000	2400000	2400000	2400000	1500000	1500000	1600000	1600000	1500000
Q0QER2	Isocitrate dehydrogenase 1	9700000	9700000	9700000	9700000	9700000	9700000	920000	12000000	250000	250000	9700000	9700000	1200000	58000000	1200000	1200000	2400000	2400000	1100000	35000000	35000000	35000000	35000000	35000000	35000000	7600000	550000	550000	550000	550000	550000	140000	5900000	1200000	1200000	140000
Q53GL5	Isocitrate dehydrogenase 2	710000	710000	710000	710000	3700000	3700000	11000000	4700000	3700000	3700000	710000	710000	1400000	810000	810000	19000000	3200000	1400000	1400000	21000000	7000000	7000000	7000000	7000000	7000000	100000	410000	100000	100000	100000	100000	310000	310000	1200000	83000000	300000
A0A0G2JW69	Keratin 79	11000000	940000	11000000	940000	940000	530000	180000	150000000	11000000	11000000	940000	940000	19000000	1000000	5500000	700000	3200000	19000000	2100000	5800000	5800000	5800000	5800000	5800000	5800000	4400000	4400000	4400000	4400000	4400000	1500000	980000	980000	980000	1200000	980000
Q63280	Keratin K5	11000000	940000	11000000	940000	940000	530000	180000	250000	11000000	11000000	940000	940000	2400000	1000000	5500000	700000	19000000	2400000	2100000	2900000	2900000	2900000	2900000	21000000	21000000	4400000	4400000	4400000	4400000	4400000	1500000	980000	980000	980000	1200000	980000
G3V908	Keratin type II	11000000	940000	11000000	940000	940000	530000	250000	920000	11000000	11000000	940000	940000	19000000	1000000	1000000	700000	19000000	2400000	2100000	21000000	21000000	2600000	2600000	2600000	2600000	4400000	4400000	4400000	4400000	4400000	1500000	980000	980000	650000	1200000	980000
Q6IFW6	Keratin, type I	8.13267e+06	951304	8.13267e+06	951304	1.02667e+06	542143	1.02667e+06	81000000	1.02667e+06	8.38276e+06	812000	812000	1100000	1100000	1100000	2400000	2400000	2200000	660000	21000000	21000000	2700000	2700000	21000000	21000000	3900000	3900000	1700000	14000000	1700000	1500000	980000	980000	538696	1200000	980000
A8K048	Kinesin-like protein	33000000	33000000	33000000	33000000	33000000	33000000	3800000	940000	33000000	33000000	33000000	33000000	2200000	5500000	2200000	2200000	2200000	2200000	2200000	2400000	2400000	2400000	20000000	20000000	20000000	3900000	3900000	2700000	2700000	2800000	2800000	2100000	2100000	1200000	1200000	2100000
P01042	Kininogen-1	30000000	1500000	30000000	1500000	1400000	1500000	15000000	430000	1500000	30000000	30000000	30000000	660000	3700000	690000	690000	690000	660000	2300000	310000	310000	1100000	990000	300000	300000	4100000	1900000	1200000	1200000	1200000	490000	480000	1800000	1800000	2500000	770000
Q05CF8	KNG1 protein	82000000	1400000	82000000	1400000	1400000	1400000	12000000	2200000	1400000	82000000	82000000	82000000	5500000	2200000	5500000	2200000	2200000	5500000	2200000	6300000	6300000	920000	490000	20000000	20000000	1500000	1500000	1500000	1500000	1500000	4300000	4300000	4300000	4300000	6800000	4300000
W8QEY1	Lactoferrin	82000000	1400000	82000000	1400000	1400000	1400000	13000000	2200000	1400000	82000000	82000000	82000000	5500000	2400000	5500000	58000000	58000000	5500000	58000000	4100000	4100000	920000	490000	4100000	4100000	7900000	7900000	7200000	2800000	550000	4300000	4300000	4300000	4300000	6800000	4300000
E7ER44	Lactotransferrin	33000000	33000000	33000000	33000000	33000000	33000000	480000	7300000	33000000	33000000	33000000	33000000	19000000	3200000	19000000	19000000	19000000	58000000	19000000	4100000	2600000	21000000	21000000	21000000	21000000	2700000	2700000	3900000	3900000	3900000	3900000	29000000	140000	440000	900000	900000
P20700	Lamin-B1	2400000	2400000	2400000	2400000	1900000	1900000	920000	920000	1900000	1900000	2400000	2400000	1400000	2200000	3100000	3100000	660000	660000	1500000	5800000	5800000	5800000	5800000	2100000	810000	1200000	41000000	1200000	1200000	1200000	1200000	140000	140000	6600000	6600000	140000
Q14766	Latent-transforming growth factor beta-binding protein 1	2400000	2400000	2400000	2400000	1900000	1900000	920000	920000	1900000	1900000	2400000	2400000	5500000	5500000	3100000	3100000	1200000	1200000	1500000	35000000	35000000	2500000	5800000	5800000	5800000	1200000	1500000	1200000	1200000	1200000	1200000	500000	500000	1200000	1200000	500000
A0A0S2Z3Y1	Lectin galactoside-binding soluble 3 binding protein isoform 1	8800000	8800000	8800000	8800000	8800000	8800000	1900000	940000	8800000	8800000	8800000	8800000	2200000	2200000	2200000	2200000	930000	2200000	2200000	2100000	1700000	1700000	1700000	1700000	1700000	14000000	3900000	550000	6600000	20000000	20000000	140000	1400000	1400000	1400000	140000
P02750	Leucine-rich alpha-2-glycoprotein	11000000	940000	11000000	940000	940000	530000	250000	920000	11000000	11000000	940000	940000	19000000	1000000	1000000	700000	2400000	2200000	2100000	21000000	20000000	20000000	20000000	21000000	21000000	4400000	4400000	4400000	4400000	4400000	1500000	980000	980000	650000	1200000	980000
A0A1S3EPT3	Leucine-rich repeat neuronal protein 4	4900000	1300000	4900000	1300000	1300000	1300000	12000000	2200000	1300000	4900000	4900000	4900000	5500000	2200000	5500000	2200000	2200000	5500000	2200000	810000	810000	2700000	810000	2900000	2900000	7200000	7200000	1500000	1500000	1500000	1500000	2100000	2100000	1200000	1200000	2100000
A0A0G2JYM0	LIM domain-binding 3	7300000	940000	7300000	940000	940000	530000	11000000	1700000	730000	730000	940000	940000	12000000	1000000	1400000	2200000	5500000	1200000	2100000	2100000	2100000	2100000	2100000	2100000	2100000	4400000	4400000	4400000	4400000	4400000	1500000	980000	980000	560000	1200000	980000
B4DJI1	L-lactate dehydrogenase	440000000	81000000	440000000	81000000	81000000	81000000	940000	1900000	81000000	440000000	2200000	2200000	2000000	2400000	5100000	2000000	1400000	2000000	2500000	20000000	810000	810000	20000000	20000000	20000000	26000000	14000000	1200000	2000000	2000000	24000000	24000000	24000000	24000000	130000000	24000000
Q498S9	LOC498793 protein	96000000	96000000	96000000	96000000	96000000	430000	11000000	250000	940000	940000	430000	430000	2400000	58000000	870000	5500000	2400000	2400000	2400000	240000	240000	21000000	4100000	4100000	4100000	2400000	2400000	1500000	340000	340000	3000000	1600000	1600000	1200000	1200000	1600000
H0Y755	Low affinity immunoglobulin gamma Fc region receptor III-A	39000000	3400000	39000000	3400000	3400000	3400000	20000000	510000	3400000	39000000	1800000	490000	2400000	3000000	4400000	4400000	4400000	2400000	440000	2800000	2800000	580000	4100000	4100000	4100000	2400000	2400000	1500000	1500000	1500000	1000000	850000	850000	850000	6600000	3300000
F2Z2Q9	Low molecular weight phosphotyrosine protein phosphatase	39000000	3400000	39000000	3400000	3400000	3400000	20000000	870000000	3400000	39000000	1800000	490000	2200000	3000000	4400000	4400000	2400000	2200000	440000	2700000	2700000	580000	4100000	4100000	4100000	2400000	2400000	1500000	1500000	3900000	1000000	850000	850000	850000	6600000	3300000
O78218	Lymphocyte antigen	3700000	3700000	3700000	3700000	3700000	3700000	2100000	940000	3700000	3700000	3700000	3700000	2400000	2400000	2400000	2400000	2400000	2400000	2400000	810000	2600000	2600000	21000000	21000000	21000000	2700000	2700000	2700000	2700000	2700000	2700000	140000	140000	140000	900000	900000
Q13094	Lymphocyte cytosolic protein 2	7300000	940000	7300000	940000	940000	530000	11000000	17000000	7300000	7300000	940000	940000	1200000	1000000	1400000	2200000	5500000	1200000	2100000	2100000	2100000	2100000	2100000	2100000	2100000	4400000	4400000	4400000	4400000	4400000	1500000	980000	980000	560000	1200000	980000
E7EMG9	Lymphocyte-specific protein 1	7300000	940000	7300000	940000	940000	530000	11000000	84000000	7300000	7300000	940000	940000	3200000	1000000	1400000	58000000	660000	3200000	2100000	21000000	21000000	1600000	1600000	1600000	1600000	4400000	4400000	4400000	4400000	4400000	1500000	980000	980000	560000	1200000	980000
P14780	Matrix metalloproteinase-9	11000000	940000	11000000	940000	940000	530000	250000	250000	11000000	11000000	940000	940000	2400000	1000000	660000	700000	19000000	2400000	2100000	21000000	21000000	21000000	21000000	2900000	2900000	4400000	4400000	4400000	4400000	4400000	1500000	980000	980000	980000	1200000	980000
A0A1S3FE05	Melanotransferrin	96000000	96000000	96000000	96000000	690000	690000	920000	30000000	690000	690000	690000	690000	58000000	5500000	58000000	58000000	58000000	58000000	58000000	21000000	21000000	2600000	2600000	2600000	2600000	1200000	1300000	1200000	2700000	7900000	7900000	310000	310000	1200000	1200000	310000
B4DHN0	Mitogen-activated protein kinase	11000000	940000	11000000	940000	940000	530000	9900000	550000	11000000	11000000	940000	940000	58000000	1000000	19000000	700000	2200000	58000000	2100000	21000000	21000000	4100000	20000000	20000000	20000000	4400000	4400000	4400000	4400000	4400000	1500000	980000	980000	980000	1200000	980000
Q16539	Mitogen-activated protein kinase 14	11000000	940000	11000000	940000	940000	530000	4700000	560000	11000000	11000000	940000	940000	1100000	1000000	2200000	700000	1400000	5500000	2100000	3200000	3200000	3200000	35000000	35000000	3200000	4400000	4400000	4400000	4400000	4400000	1500000	980000	980000	980000	1200000	980000
Q53FH6	Mitogen-activated protein kinase kinase 1	11000000	940000	11000000	940000	940000	530000	1900000	690000	11000000	11000000	940000	940000	1400000	1000000	58000000	700000	1400000	5500000	2100000	4100000	4100000	4100000	4100000	4100000	4100000	4400000	4400000	4400000	4400000	4400000	1500000	980000	980000	980000	1200000	980000
O55164	Multiple PDZ domain protein	96000000	96000000	96000000	96000000	96000000	590000	11000000	1600000	940000	940000	590000	590000	1100000	58000000	1100000	3200000	58000000	1100000	1100000	3200000	3200000	3200000	4100000	4100000	4100000	7200000	7200000	1500000	1500000	1500000	1500000	310000	310000	1200000	1200000	310000
Q32KJ5	N-acetylglucosamine-6-sulfatase	7300000	940000	7300000	940000	940000	530000	1100000	8400000	7300000	7300000	940000	940000	3200000	1000000	1400000	5800000	660000	3200000	2100000	21000000	21000000	1600000	1600000	1600000	1600000	4400000	4400000	4400000	4400000	4400000	1500000	980000	980000	560000	1200000	980000
P00387	NADH-cytochrome b5 reductase 3	11000000	940000	11000000	940000	940000	530000	250000	21000000	11000000	11000000	940000	940000	2200000	1000000	1200000	700000	2400000	2200000	2100000	21000000	2900000	2400000	2400000	21000000	21000000	4400000	4400000	4400000	4400000	4400000	1500000	980000	980000	980000	1200000	980000
P22894	Neutrophil collagenase	11000000	940000	11000000	940000	940000	530000	530000	530000	11000000	11000000	940000	940000	2200000	1000000	19000000	700000	2200000	2200000	2100000	2100000	2100000	2100000	810000	810000	810000	4400000	4400000	4400000	4400000	4400000	1500000	980000	980000	980000	1200000	980000
P14598	Neutrophil cytosol factor 1	11000000	940000	11000000	940000	940000	530000	150000000	920000	11000000	11000000	940000	940000	3200000	1000000	1000000	700000	19000000	2400000	2100000	21000000	21000000	21000000	20000000	1600000	1600000	4400000	4400000	4400000	4400000	4400000	1500000	980000	980000	980000	1200000	980000
Q59F14	Neutrophil cytosol factor 2	11000000	940000	11000000	940000	940000	530000	1900000	820000	11000000	11000000	940000	940000	1400000	1000000	1000000	700000	5500000	5500000	2100000	21000000	2600000	810000	810000	2000000	2000000	4400000	4400000	4400000	4400000	4400000	1500000	980000	980000	980000	1200000	980000
Q15080	Neutrophil cytosol factor 4	11000000	940000	11000000	940000	940000	530000	1900000	820000	11000000	11000000	940000	940000	5500000	1000000	1000000	700000	5500000	660000	2100000	20000000	20000000	2100000	2100000	5800000	5800000	4400000	4400000	4400000	4400000	4400000	1500000	980000	980000	980000	1200000	980000
A0A1S3GKU0	NF-kappa-B inhibitor-like protein 2	96000000	96000000	96000000	96000000	96000000	96000000	440000000	120000000	440000000	440000000	440000000	440000000	660000	2200000	630000	630000	630000	660000	630000	2100000	2100000	2700000	35000000	35000000	35000000	1500000	3900000	3900000	1500000	1500000	1500000	310000	310000	1200000	450000	310000
A0A091DT21	Non-specific protein-tyrosine kinase	550000	550000	550000	550000	550000	550000	920000	20000000	550000	550000	550000	550000	2200000	5500000	2200000	2200000	1100000	58000000	1100000	5800000	2000000	2000000	2000000	2000000	2000000	14000000	14000000	14000000	14000000	14000000	14000000	140000	140000	960000	6300000	6300000
A0A0F3RHC1	Oxygen-dependent coproporphyrinogen-III oxidase	100000000	100000000	100000000	100000000	100000000	100000000	440000000	140000000	870000000	870000000	870000000	870000000	180000	1200000	19000000	1200000	1200000	19000000	2200000	5800000	5800000	5800000	21000000	21000000	21000000	7900000	7900000	3900000	3900000	14000000	14000000	2100000	2100000	1200000	1200000	2100000
Q06830	Peroxiredoxin 1	11000000	940000	11000000	940000	940000	530000	250000	14000000	11000000	11000000	940000	940000	2200000	1000000	3200000	700000	2400000	2200000	2100000	2100000	5800000	2400000	2400000	2400000	2400000	4400000	4400000	4400000	4400000	4400000	1500000	980000	980000	980000	1200000	980000
A6NIW5	Peroxiredoxin 2	11000000	940000	11000000	940000	940000	530000	1600000	550000	11000000	11000000	940000	940000	1100000	1000000	2400000	700000	2200000	1100000	2100000	4100000	4100000	810000	2600000	20000000	20000000	4400000	4400000	4400000	4400000	4400000	1500000	980000	980000	980000	1200000	980000
Q53HC2	Peroxiredoxin 3	11000000	940000	11000000	940000	940000	530000	1600000	550000	11000000	11000000	940000	940000	58000000	1000000	2200000	700000	19000000	1400000	2100000	3200000	3200000	2400000	2400000	35000000	35000000	4400000	4400000	4400000	4400000	4400000	1500000	980000	980000	980000	1200000	980000
P30044	Peroxiredoxin 5	11000000	940000	11000000	940000	940000	530000	4700000	560000	11000000	11000000	940000	940000	19000000	1000000	2200000	700000	1100000	1400000	2100000	3200000	3200000	21000000	21000000	21000000	21000000	4400000	4400000	4400000	4400000	4400000	1500000	980000	980000	980000	1200000	980000
A4UCS6	Peroxiredoxin 6 (Fragment)	11000000	940000	11000000	940000	940000	530000	1900000	920000	11000000	11000000	940000	940000	5500000	1000000	1000000	700000	5500000	1200000	2100000	2100000	2100000	2100000	2700000	2700000	2700000	4400000	4400000	4400000	4400000	4400000	1500000	980000	980000	980000	1200000	980000
Q505J8	Phenylalanine-tRNA ligase alpha subunit	100000000	100000000	1100000	1100000	1100000	1200000	2200000	1100000	2200000	2200000	1200000	1200000	1100000	2200000	920000	920000	920000	1100000	920000	5800000	5800000	13000000	13000000	810000	3200000	3900000	3900000	3900000	3900000	3900000	3900000	140000	140000	1200000	1500000	140000
P18424	Phosphatidylcholine-sterol acyltransferase	530000	530000	530000	530000	530000	530000	920000	15000000	530000	530000	530000	530000	19000000	58000000	19000000	19000000	2200000	2200000	2200000	5800000	5800000	2700000	20000000	20000000	20000000	2400000	1500000	1500000	1500000	1500000	1500000	600000	2100000	1200000	1200000	600000
O14943	Phosphofructokinase-P	11000000	940000	11000000	940000	940000	530000	84000000	920000	11000000	11000000	940000	940000	660000	1000000	1000000	700000	1200000	19000000	2100000	5800000	2100000	2100000	2100000	2100000	2100000	4400000	4400000	4400000	4400000	4400000	1500000	980000	980000	980000	1200000	980000
P36871	Phosphoglucomutase-1	11000000	940000	11000000	940000	940000	530000	150000000	920000	11000000	11000000	940000	940000	1200000	1000000	1000000	700000	3200000	19000000	2100000	5800000	5800000	5800000	5800000	5800000	5800000	4400000	4400000	4400000	4400000	4400000	1500000	980000	980000	980000	1200000	980000
E9PD70	Phosphoglucomutase-2	11000000	940000	11000000	940000	940000	530000	17000000	920000	11000000	11000000	940000	940000	5500000	1000000	1000000	700000	660000	3200000	2100000	5800000	5800000	5800000	5800000	5800000	5800000	4400000	4400000	4400000	4400000	4400000	1500000	980000	980000	980000	1200000	980000
P00558	Phosphoglycerate kinase 1	11000000	940000	11000000	940000	940000	530000	1600000	550000	11000000	11000000	940000	940000	2200000	1000000	2400000	700000	58000000	1100000	2100000	21000000	21000000	21000000	21000000	21000000	21000000	4400000	4400000	4400000	4400000	4400000	1500000	980000	980000	980000	1200000	980000
P07205	Phosphoglycerate kinase 2	39000000	39000000	39000000	39000000	39000000	39000000	920000	440000000	870000000	870000000	870000000	870000000	2200000	58000000	2200000	2200000	2200000	2200000	2200000	21000000	21000000	2500000	21000000	21000000	21000000	3900000	3900000	14000000	14000000	14000000	14000000	140000	140000	140000	1600000	1600000
Q6P6D7	Phosphoglycerate mutase 1	74000000	74000000	74000000	74000000	74000000	74000000	440000000	1900000000	440000000	440000000	440000000	440000000	2200000	58000000	2200000	2200000	2200000	2200000	2200000	21000000	20000000	20000000	20000000	20000000	20000000	20000000	20000000	7200000	20000000	20000000	20000000	140000	140000	140000	1700000	1700000
P15259	Phosphoglycerate mutase 2	42000000	42000000	42000000	42000000	42000000	42000000	150000000	440000000	1900000000	1900000000	1900000000	1900000000	19000000	58000000	19000000	19000000	2200000	19000000	2200000	5800000	5800000	5800000	5800000	5800000	5800000	7900000	7200000	2700000	550000	550000	550000	140000	140000	140000	1800000	1800000
Q6P4A8	Phospholipase B-like 1	42000000	42000000	42000000	42000000	42000000	42000000	210000000	440000000	310000000	310000000	310000000	310000000	3200000	5500000	3200000	3200000	3200000	3200000	3200000	5800000	5800000	5800000	5800000	810000	810000	7200000	7200000	1500000	7200000	7200000	7200000	310000	140000	310000	3300000	3300000
A0A024RD93	Phosphoribosylaminoimidazole carboxylase	81000000	81000000	81000000	81000000	81000000	81000000	150000000	440000000	870000000	870000000	870000000	870000000	2400000	58000000	2400000	58000000	58000000	2400000	58000000	35000000	35000000	35000000	35000000	35000000	35000000	550000	5600000	5600000	550000	550000	550000	140000	310000	310000	3300000	3300000
G5BCV0	Pigment epithelium-derived factor	3000000	3000000	3000000	3000000	3000000	3000000	940000	940000	3000000	3000000	3000000	3000000	700000	2200000	470000	470000	3200000	700000	3200000	2100000	2100000	2400000	2400000	2600000	2600000	2400000	2400000	2400000	1500000	1500000	1500000	5900000	5900000	440000	440000	5900000
Q6P734	Plasma protease C1 inhibitor	17000000	4600000	17000000	4600000	1900000	1900000	920000	920000	17000000	17000000	4600000	4600000	5500000	470000	4800000	4800000	19000000	19000000	2000000	2700000	2700000	2700000	2700000	200000	200000	13000000	13000000	13000000	2800000	2800000	2800000	140000	140000	1200000	1200000	140000
G5BE83	Plasma retinol-binding protein	120000000	120000000	120000000	120000000	120000000	120000000	440000000	870000000	440000000	440000000	440000000	440000000	2200000	2200000	2200000	2200000	2200000	2200000	2200000	4100000	4100000	4100000	4100000	4100000	4100000	7900000	1400000	1400000	7900000	7900000	7900000	1900000	890000	890000	3300000	3300000
B2R7F8	Plasminogen	60000000	60000000	60000000	60000000	60000000	60000000	260000000	440000000	440000000	440000000	440000000	440000000	1200000	2200000	930000	930000	930000	1200000	930000	21000000	21000000	21000000	20000000	810000	810000	1500000	7200000	1500000	1500000	1500000	1500000	1900000	310000	310000	4300000	4300000
P02775	Platelet basic protein	82000000	82000000	82000000	82000000	82000000	82000000	210000000	96000000	870000000	870000000	870000000	870000000	1400000	58000000	1400000	1400000	1400000	1400000	1400000	5800000	20000000	20000000	35000000	35000000	35000000	7200000	7200000	7200000	2800000	7200000	7200000	1900000	310000	310000	4300000	4300000
A0A075B738	Platelet endothelial cell adhesion molecule	880000	880000	880000	880000	880000	880000	880000	71000000	880000	940000	940000	940000	58000000	5500000	58000000	19000000	19000000	2400000	1200000	5800000	5800000	640000	21000000	21000000	21000000	5600000	5600000	6600000	6600000	6600000	6600000	140000	830000	960000	4300000	4300000
P02776	Platelet factor 4	3800000	3800000	3800000	3800000	3800000	300000	940000	11000000	3800000	3800000	300000	300000	58000000	470000	470000	2400000	58000000	5500000	2200000	20000000	4100000	21000000	21000000	21000000	21000000	7200000	7200000	1500000	1500000	1500000	1500000	140000	140000	400000	5100000	5100000
E7EVU1	Platelet glycoprotein 4	81000000	81000000	81000000	81000000	81000000	81000000	150000000	440000000	440000000	440000000	440000000	440000000	700000	58000000	700000	58000000	58000000	700000	58000000	21000000	21000000	21000000	4100000	21000000	21000000	5400000	2400000	550000	550000	550000	550000	980000	980000	310000	6600000	6600000
F8WEQ7	Programmed cell death 6-interacting protein	82000000	82000000	82000000	82000000	82000000	82000000	310000000	96000000	440000000	440000000	440000000	440000000	660000	2200000	710000	710000	710000	660000	710000	21000000	21000000	21000000	21000000	21000000	21000000	550000	1700000	1700000	550000	7200000	7200000	24000000	24000000	310000	6900000	6900000
Q9BUL8	Programmed cell death protein 10	39000000	39000000	39000000	39000000	39000000	39000000	920000	440000000	440000000	440000000	440000000	440000000	58000000	58000000	2200000	58000000	2200000	2200000	2200000	2900000	2900000	2900000	2900000	2900000	35000000	1500000	3900000	3900000	1500000	1500000	1500000	24000000	24000000	320000	6900000	6900000
A0A2I5YL72	Pro-interleukin-16	120000000	120000000	120000000	120000000	120000000	120000000	440000000	870000000	870000000	870000000	870000000	870000000	19000000	700000	180000	700000	700000	19000000	700000	4100000	4100000	2600000	20000000	21000000	21000000	2800000	2800000	7200000	550000	7200000	7200000	140000	830000	1200000	1200000	140000
F8VR77	Proliferation-associated protein 2G4	71000000	71000000	71000000	71000000	71000000	71000000	440000000	870000000	440000000	440000000	440000000	440000000	2400000	2400000	2400000	2400000	2400000	2400000	2400000	3200000	810000	810000	810000	810000	810000	550000	7900000	7200000	3900000	20000000	20000000	2100000	310000	310000	8500000	8500000
D3DSW3	Proline synthetase	82000000	82000000	82000000	82000000	82000000	82000000	210000000	440000000	870000000	870000000	870000000	870000000	19000000	58000000	19000000	19000000	19000000	19000000	19000000	5800000	5800000	5800000	5800000	5800000	5800000	550000	20000000	20000000	1200000	1200000	1200000	320000	320000	310000	8700000	8700000
D3ZWN2	Proline-rich 30	3700000	3700000	3700000	3700000	3700000	3700000	2100000	940000	3700000	3700000	3700000	3700000	8400000	2400000	7400000	2400000	2400000	2400000	2400000	810000	2600000	2600000	2100000	7100000	21000000	2700000	2700000	2700000	2700000	2700000	2700000	140000	140000	140000	900000	900000
P02760	Protein AMBP	3100000	3100000	2100000	2100000	2100000	1300000	940000	940000	2100000	2100000	1300000	3800000	19000000	2400000	4300000	4300000	4300000	19000000	2700000	2400000	1700000	1700000	1700000	1700000	1700000	7400000	370000	7400000	7400000	7400000	2800000	980000	600000	600000	370000	980000
P05771	Protein kinase C beta type	42000000	42000000	42000000	42000000	42000000	42000000	150000000	440000000	260000000	260000000	260000000	260000000	19000000	58000000	19000000	19000000	19000000	3200000	1400000	4100000	4100000	2700000	2700000	2700000	2700000	5600000	5600000	5600000	5600000	7200000	7200000	140000	830000	310000	8700000	8700000
C9K0E3	Protein kinase C delta type	3800000	3800000	3800000	3800000	3800000	300000	940000	11000000	3800000	3800000	300000	300000	1100000	930000	930000	2400000	2200000	5500000	1400000	2900000	21000000	810000	810000	2100000	2100000	2800000	2800000	2700000	3900000	7900000	7900000	310000	21000000	310000	12000000	12000000
A0A0K0CSY4	Protein kinase domain-containing protein	130000000	130000000	130000000	130000000	130000000	130000000	440000000	870000000	870000000	870000000	870000000	870000000	180000	2400000	180000	2400000	2400000	180000	2400000	4100000	4100000	4100000	41000	810000	810000	1500000	1500000	1500000	2400000	1500000	1500000	140000	140000	1200000	1200000	140000
B2RB89	Protein kinase, cAMP-dependent, catalytic, beta	3800000	3800000	3800000	3800000	3800000	300000	7300000	11000000	3800000	3800000	300000	300000	1400000	2400000	1400000	2200000	1400000	1200000	1200000	3200000	3200000	2600000	2600000	2600000	2600000	1200000	4600000	41000000	2800000	2800000	2800000	310000	830000	960000	17000000	17000000
B2RAH5	Protein phosphatase 1 regulatory subunit	2200000	2200000	2200000	2200000	2200000	2200000	5500000	4500000	2200000	2200000	2200000	2200000	470000	2200000	470000	470000	470000	470000	470000	2400000	2400000	2400000	4100000	4100000	4100000	2700000	2700000	2400000	550000	2400000	2400000	29000000	29000000	1200000	1200000	29000000
B2R577	Protein S100	60000000	60000000	60000000	60000000	60000000	60000000	310000000	870000000	440000000	440000000	440000000	440000000	3200000	2400000	3200000	3200000	3200000	3200000	3200000	4100000	2000000	2000000	35000000	21000000	21000000	7900000	7900000	550000	2700000	550000	550000	220000	140000	140000	140000	220000
Q62975	Protein Z-dependent protease inhibitor	2100000	2100000	2100000	2100000	2100000	2100000	2100000	4500000	2100000	2100000	2100000	2100000	2400000	3200000	2400000	2400000	2400000	2400000	2400000	2100000	2100000	21000000	20000000	20000000	20000000	5400000	5400000	2400000	2400000	2400000	2400000	140000	140000	6600000	6600000	140000
G3V843	Prothrombin	1000000	1000000	1000000	1000000	1000000	1000000	550000	920000	250000	250000	1000000	1000000	2200000	2200000	1100000	1100000	58000000	2200000	370000	4100000	4100000	21000000	20000000	20000000	20000000	1100000	5600000	1100000	1100000	1100000	850000	980000	980000	980000	980000	980000
A0A6M2DIF2	Putative hemoglobin subunit beta-1	140000000	140000000	140000000	140000000	140000000	140000000	2100000	2100000	2100000	2100000	2100000	2100000	5500000	1300000	1300000	4300000	4300000	5500000	4300000	82000	82000	82000	82000	82000	200000	1500000	1700000	1500000	1500000	1500000	1500000	980000	980000	980000	980000	980000
A8MVU1	Putative neutrophil cytosol factor 1C	81000000	81000000	81000000	81000000	81000000	81000000	140000000	440000000	440000000	440000000	440000000	440000000	2400000	58000000	2400000	58000000	58000000	2400000	58000000	21000000	21000000	2400000	2900000	21000000	21000000	550000	2400000	7200000	7200000	7200000	7200000	220000	140000	140000	140000	220000
O60361	Putative nucleoside diphosphate kinase	39000000	39000000	39000000	39000000	39000000	39000000	920000	440000000	870000000	870000000	870000000	870000000	58000000	5500000	58000000	58000000	660000	58000000	660000	3200000	3200000	3200000	3200000	3200000	3200000	2700000	2700000	3900000	2700000	2700000	2700000	1500000	140000	140000	140000	1500000
Q14644	Ras GTPase-activating protein 3	74000000	74000000	74000000	74000000	74000000	74000000	440000000	260000000	440000000	440000000	440000000	440000000	2200000	58000000	2200000	2200000	2200000	2200000	2200000	810000	7000000	7000000	20000000	35000000	35000000	7600000	7600000	6600000	2800000	7200000	7200000	140000	220000	140000	140000	140000
E7EMB4	RAS guanyl-releasing protein 2	39000000	39000000	39000000	39000000	39000000	39000000	140000000	440000000	870000000	870000000	870000000	870000000	58000000	58000000	58000000	58000000	58000000	58000000	58000000	21000000	21000000	21000000	810000	810000	810000	2400000	2400000	1500000	2400000	1500000	1500000	24000000	24000000	140000	140000	24000000
G3V633	Receptor protein-tyrosine kinase	100000000	100000000	100000000	100000000	100000000	100000000	250000	21000000	19000000	19000000	19000000	19000000	1200000	2200000	1200000	660000	3200000	2200000	2200000	21000000	21000000	21000000	35000000	35000000	21000000	5400000	1700000	5600000	5600000	5600000	19000000	24000000	24000000	24000000	24000000	24000000
A0A0P6IYM7	Retinol-binding protein	210000000	210000000	210000000	210000000	210000000	210000000	440000000	440000000	440000000	440000000	440000000	440000000	2200000	2200000	2200000	2200000	2200000	2200000	2200000	4100000	2100000	2100000	2100000	2100000	2100000	6600000	1400000	1400000	6600000	1200000	1200000	21000000	21000000	890000	890000	21000000
B4F7B5	RGD1564456 protein	210000000	210000000	210000000	210000000	210000000	210000000	440000000	440000000	440000000	440000000	440000000	440000000	3200000	58000000	3200000	3200000	3200000	3200000	3200000	810000	810000	810000	20000000	20000000	20000000	1500000	1500000	1500000	1500000	3900000	3900000	21000000	21000000	1200000	1200000	21000000
G5C768	Rho GTPase-activating protein 18	210000000	210000000	210000000	210000000	210000000	210000000	440000000	440000000	440000000	440000000	440000000	440000000	19000000	5500000	19000000	19000000	19000000	19000000	19000000	2100000	2100000	2100000	2100000	2100000	2100000	5600000	5600000	5600000	5600000	5600000	5600000	29000000	1500000	1200000	1200000	29000000
Q68G14	RNA helicase	310000000	310000000	310000000	310000000	310000000	310000000	870000000	870000000	870000000	870000000	870000000	870000000	2400000	2200000	2400000	2400000	2400000	2400000	1400000	5800000	5800000	810000	810000	1700000	21000000	7200000	1500000	2400000	2400000	2400000	290000	290000	290000	2100000	290000	290000
A0A0R3SQB0	SEC7 domain-containing protein	310000000	310000000	310000000	310000000	310000000	310000000	870000000	870000000	870000000	870000000	870000000	870000000	2200000	2200000	1000000	1000000	1000000	2200000	1000000	21000000	21000000	21000000	35000000	35000000	35000000	14000000	14000000	7200000	5400000	7200000	7200000	630000	630000	990000	5100000	5100000
A0A024R8Q0	Septin 9	71000000	71000000	71000000	71000000	71000000	71000000	440000000	870000000	440000000	440000000	440000000	440000000	19000000	58000000	19000000	19000000	19000000	2400000	1200000	5800000	21000000	21000000	4100000	2100000	2000000	7200000	7200000	7200000	7200000	7200000	7200000	5900000	5900000	140000	140000	5900000
C9J2Q4	Septin-2	81000000	81000000	81000000	81000000	81000000	81000000	440000000	440000000	440000000	440000000	440000000	440000000	700000	58000000	700000	58000000	58000000	700000	58000000	2700000	2700000	810000	810000	3200000	3200000	6600000	6600000	1500000	7200000	1500000	1500000	29000000	29000000	140000	140000	29000000
A0A0S3NTJ2	Serine (Or cysteine) peptidase inhibitor	4600000	880000	4600000	880000	880000	880000	880000	30000000	880000	4600000	4600000	4600000	2200000	5500000	2200000	1200000	2200000	19000000	2200000	2000000	2000000	2000000	21000000	2000000	2000000	14000000	14000000	550000	5600000	2800000	2800000	140000	140000	2200000	520000	140000
J3QL05	Serine/arginine-rich-splicing factor 2	80000000	80000000	80000000	80000000	80000000	80000000	440000000	440000000	440000000	440000000	440000000	440000000	1200000	58000000	1200000	58000000	58000000	1200000	58000000	21000000	20000000	1600000	1600000	1600000	1600000	14000000	14000000	14000000	20000000	20000000	20000000	140000	220000	220000	220000	140000
A0A0K0DFR4	Serine/threonine-protein phosphatase	82000000	82000000	82000000	82000000	82000000	82000000	260000000	96000000	1900000000	1900000000	1900000000	1900000000	19000000	2400000	19000000	2400000	2400000	19000000	2400000	21000000	21000000	21000000	21000000	21000000	21000000	5600000	41000000	41000000	5600000	5600000	5600000	140000	140000	310000	310000	140000
B4DZF8	Serine/threonine-protein phosphatase 2A activator	80000000	80000000	80000000	80000000	80000000	80000000	440000000	310000000	440000000	440000000	440000000	440000000	2400000	58000000	2400000	58000000	58000000	2400000	58000000	810000	810000	2100000	21000000	21000000	2100000	2700000	2700000	2700000	2700000	2700000	2700000	140000	220000	220000	220000	140000
P12346	Serotransferrin	2400000	2400000	2400000	2400000	1900000	1900000	920000	920000	1900000	1900000	2400000	2400000	1400000	2200000	3100000	3100000	5500000	5500000	1500000	4100000	1700000	1700000	5800000	5800000	5800000	1200000	2400000	1200000	1200000	1200000	1200000	980000	320000	990000	6900000	6900000
G3V7Z4	Serpine2	3900000	3900000	3900000	3900000	3900000	3900000	940000	11000000	480000	480000	480000	480000	2400000	5500000	2400000	2400000	2400000	2400000	2400000	920000	920000	920000	21000000	21000000	21000000	550000	4600000	46000000	54000000	9600000	9600000	5900000	5900000	1200000	1200000	5900000
A0A1S3FI52	Serum albumin-like	1400000	82000000	1400000	82000000	14000000	14000000	920000	15000000	14000000	14000000	82000000	82000000	720000	1200000	1700000	1700000	1700000	720000	2400000	20000000	20000000	2500000	2900000	6600000	6600000	2300000	27000000	2300000	2300000	2300000	9900000	13000000	13000000	21000000	43000000	5100000
A0A0H2UHH2	Serum amyloid P-component	8100000	8100000	8100000	8100000	8100000	8100000	4500000	940000	8100000	8100000	8100000	8100000	58000000	2400000	58000000	58000000	58000000	58000000	58000000	2100000	21000000	1600000	1600000	2100000	2600000	550000	940000	940000	940000	940000	940000	1500000	1500000	1200000	1200000	1500000
P55159	Serum paraoxonase/arylesterase 1	440000000	440000000	440000000	440000000	440000000	440000000	1900000000	1900000000	1900000000	1900000000	1900000000	1900000000	2200000	2200000	1000000	1000000	1000000	2200000	1000000	1700000	810000	810000	810000	21000000	21000000	1500000	1500000	5600000	3900000	5600000	5600000	140000	140000	1200000	1200000	140000
G5AJS8	Serum paraoxonase/lactonase 3	33000000	33000000	33000000	33000000	33000000	33000000	9700000	7300000	33000000	33000000	33000000	33000000	3200000	2800000	3200000	3200000	58000000	3200000	58000000	5800000	5800000	5800000	4100000	21000000	21000000	7200000	7200000	1500000	1500000	1500000	1500000	2100000	2100000	1200000	1200000	2100000
Q7TP24	Signal recognition particle receptor subunit beta	2400000	2400000	2400000	2400000	1900000	1900000	920000	920000	1900000	1900000	2400000	2400000	5500000	5500000	3100000	3100000	3200000	3200000	1500000	4100000	4100000	1600000	5800000	5800000	5800000	1200000	1500000	1200000	1200000	1200000	1200000	13000000	13000000	6600000	6600000	13000000
Q9JJ08	Soluble FLT-1	100000000	100000000	100000000	100000000	100000000	100000000	250000	14000000	19000000	19000000	19000000	19000000	58000000	2200000	58000000	58000000	19000000	58000000	19000000	6300000	20000000	20000000	35000000	2100000	2100000	5600000	5600000	5400000	5400000	14000000	19000000	24000000	24000000	24000000	24000000	24000000
A0A0K0DDX7	Store-operated calcium entry-associated regulatory factor	780000	780000	780000	780000	780000	780000	780000	20000000	780000	940000	940000	940000	2400000	2200000	2400000	5500000	2200000	3200000	1400000	21000000	20000000	810000	810000	21000000	21000000	550000	1300000	1500000	2400000	1500000	1500000	2100000	2100000	5600000	5600000	2100000
F5H783	Stress-induced-phosphoprotein 1	42000000	42000000	42000000	42000000	42000000	42000000	210000000	440000000	440000000	440000000	440000000	440000000	19000000	58000000	19000000	19000000	19000000	5500000	2200000	920000	920000	920000	920000	2400000	2400000	1500000	1500000	3900000	1500000	1500000	1500000	310000	310000	310000	310000	310000
H9ZYJ2	Thioredoxin	2800000	1100000	2800000	1100000	1100000	1100000	12000000	81000000	1100000	2800000	2800000	2800000	1400000	2800000	1400000	2400000	2400000	2200000	660000	2100000	2100000	2100000	2900000	5800000	5800000	550000	880000	6600000	14000000	5400000	5400000	310000	310000	1200000	1200000	310000
Q9BRA2	Thioredoxin domain-containing protein 17	3800000	3800000	3800000	3800000	3800000	300000	7300000	11000000	3800000	3800000	300000	300000	1400000	5500000	1400000	2200000	1100000	660000	660000	5800000	2600000	1600000	1600000	2100000	2100000	14000000	14000000	6600000	7900000	7900000	7900000	140000	140000	1200000	1200000	140000
P30048	Thioredoxin-dependent peroxide reductase	3800000	3800000	3800000	3800000	3800000	300000	7300000	11000000	3800000	3800000	300000	300000	5500000	930000	930000	2200000	1400000	3200000	1200000	5800000	5800000	5800000	5800000	5800000	5800000	14000000	3900000	550000	7200000	7200000	7200000	980000	890000	5600000	5600000	980000
G5BKR5	Thyroxine-binding globulin	8800000	8800000	8800000	8800000	8800000	8800000	1900000	940000	8800000	8800000	8800000	8800000	2200000	58000000	2200000	2200000	3200000	2200000	3200000	20000000	20000000	20000000	20000000	20000000	2400000	7200000	7200000	7200000	7200000	7200000	7200000	310000	980000	1400000	1400000	310000
D3ZVI2	Transcription activation suppressor family member 2	440000000	440000000	440000000	440000000	440000000	440000000	1900000000	1900000000	1900000000	1900000000	1900000000	1900000000	2200000	5500000	2200000	2200000	1100000	2200000	1100000	21000000	21000000	21000000	21000000	21000000	2100000	1700000	1700000	1700000	1700000	1700000	1700000	140000	21000000	1200000	1200000	140000
Q566R6	Transcription factor 19	39000000	3400000	39000000	3400000	3400000	3400000	2000000	5700000	3400000	39000000	1800000	490000	2200000	3000000	4400000	4400000	2400000	2200000	440000	2700000	2700000	580000	4100000	4100000	4100000	2400000	2400000	1500000	1500000	3900000	1000000	850000	850000	850000	6600000	3300000
P02766	Transthyretin	440000000	440000000	360000	360000	360000	360000	250000	360000	250000	250000	250000	250000	660000	660000	660000	660000	660000	660000	660000	5800000	5800000	5800000	5800000	5800000	5800000	1200000	1200000	1200000	1200000	1200000	1200000	140000	2200000	2200000	580000	140000
A0A158R1A2	Ubiquitin carboxyl-terminal hydrolase	3900000	3400000	3900000	3400000	3400000	3400000	2000000	510000	3400000	3900000	1800000	490000	24000000	3000000	44000000	4400000	44000000	2400000	440000	2800000	2800000	580000	4100000	4100000	4100000	2400000	24000000	15000000	1500000	1500000	1000000	850000	850000	850000	6600000	3300000
A0A564ZA09	UDP-glucose 6-dehydrogenase	440000000	81000000	440000000	81000000	81000000	81000000	940000	940000	81000000	440000000	2200000	2200000	2000000	2400000	5100000	2000000	2000000	2000000	2500000	41000	41000	13000000	20000000	20000000	20000000	26000000	14000000	1200000	2000000	2000000	24000000	24000000	24000000	24000000	130000000	24000000
A0A1L3TIV4	V(D)J recombination-activating protein 1	3900000	3900000	3900000	3900000	3900000	3900000	940000	11000000	480000	480000	480000	480000	2400000	5500000	2400000	2400000	2400000	2400000	2400000	920000	920000	920000	21000000	21000000	21000000	550000	4600000	4600000	5400000	9600000	9600000	5900000	5900000	1200000	1200000	5900000
P53767	Vascular endothelial growth factor receptor 1	100000000	100000000	100000000	100000000	100000000	100000000	250000	530000	20000000	20000000	20000000	20000000	2200000	2400000	2200000	58000000	1200000	2200000	1200000	21000000	21000000	21000000	35000000	20000000	20000000	6600000	6600000	1500000	7200000	1500000	19000000	24000000	24000000	24000000	24000000	24000000
G5BVN8	Vitronectin	39000000	3400000	39000000	3400000	3400000	3400000	20000000	590000	3400000	39000000	1800000	490000	2400000	3000000	4400000	4400000	4400000	2400000	440000	5800000	35000000	580000	4100000	2400000	2400000	1500000	2400000	2400000	2400000	2400000	1000000	850000	850000	850000	6600000	3300000
